# Supplementary material for: Requirements Analysis and Specification for a Molecular Tumor Board Platform Based on cBioPortal
Source: MDPI journal article supplement (doi:10.3390/diagnostics10020093), 2020-02-10
Supplement: s1 [file s1]

# Note

Since we conducted the interviews in German language, these slides were translated for this publication.

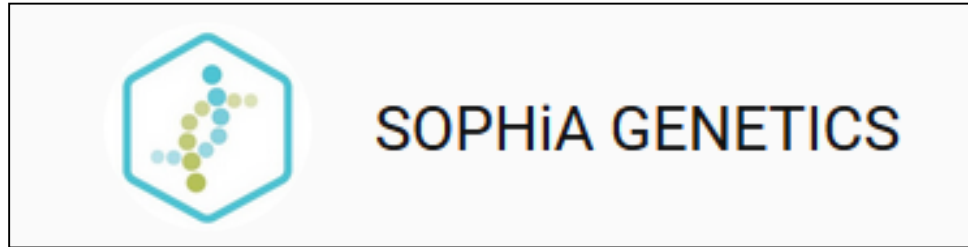

# 1. SOPHiA GENETICS

Online platform for analysis of high-throughput sequencing data and clinical interpretation of variants. It is also possible to share the evaluation of variants with other institutions.

# SNV/INDELs

WORKSPACE

Requests

ANAL... BRCA

ANALYSIS

K01\_S1\_L001\_R1\_001.fastq.gz

BRCA

S15 - -

BRCA

2 genes

Patient's Disease (0)

OVERVIEW

SCREENING

GENES

SNVs/INDELs

CNVs

WARNINGS

Sophia Filters

Retained Variants

24

Highly Pathogenic

A

4

Potentially Patho...

B

3

Unknown Signific...

C

10

Likely Benign

D

7

Low Confidence V...

9

Flagged Variants

10

Variant List - sorted by: PRED\_CAT > PATHOGENICITY\_CLASS > GENE

| P | Pat. | i... | ! | type  | gene  | cod. cons. | c.DNA        | depth | VF%   | ref      | alt      |
|---|------|------|---|-------|-------|------------|--------------|-------|-------|----------|----------|
| A |      |      |   | INDEL | BRCA2 | frameshift | c.6373dupA   | 797   | 50.6  | GAAAA... | GAAAA... |
| B |      |      |   | SNP   | BRCA1 | missense   | c.4956G>A    | 224   | 47.8  | C        | T        |
| C | 5    |      |   | SNP   | BRCA1 | intronic   | c.4987-68A>G | 238   | 48.7  | T        | C        |
| C | 5    |      |   | SNP   | BRCA1 | intronic   | c.4485-63C>G | 535   | 50.5  | G        | C        |
| C | 5    |      |   | SNP   | BRCA1 | synonymous | c.2311T>C    | 338   | 53.0  | A        | G        |
| C | 4    |      |   | SNP   | BRCA1 | synonymous | c.2082C>T    | 175   | 45.7  | G        | A        |
| C | 4    |      |   | SNP   | BRCA2 | synonymous | c.4563A>G    | 686   | 99.7  | A        | G        |
| C | 3    |      |   | SNP   | BRCA2 | synonymous | c.6513G>C    | 200   | 100.0 | G        | C        |
| C | 2    |      |   | SNP   | BRCA1 | missense   | c.3113A>G    | 692   | 44.4  | T        | C        |
| C | 1    |      |   | SNP   | BRCA1 | intronic   | c.5152+66G>A | 292   | 45.2  | C        | T        |
| C | 1    |      |   | SNP   | BRCA2 | intronic   | c.7806-14T>C | 574   | 48.8  | T        | C        |

OVERVIEW

DETAILS

FLAGGING

VIEWER

SIMILAR PATIENTS

WARNINGS

reads

224

DEPTH

175 min

883 max

frequencies

1/8

RUN

7%

ACCOUNT

3.5%

flagging

16 9

1 2 3 4 5

D C B A

Add To Rep...

0

transcript

NM\_007294

cDNA

c.4956G>A

ref/alt

C→T

sequence

ATG→ATA

amino acid

M→I

protein

p.Met1652Ile

strand

<<<

rs number

SNP

31

16-15

missense

## Requests

samples:8

BRCA

## Samples


 report

| level    | count |
|----------|-------|
| low      | 5     |
| medium   | 2     |
| rejected | 1     |

40282-197-S17 

40283-198-S31 

40277-192-S8 

amplicon: BRCA1\_ex19\_01 - confidence: HIGH - plex 2

Sample: 40282-197-S17

CN (copy number)

Amplicons

| Amplicon      | CN (copy number) |
|---------------|------------------|
| BRCA1_ex24_01 | 1.9              |
| BRCA1_ex23_01 | 1.8              |
| BRCA1_ex22_01 | 2.0              |
| BRCA1_ex21_01 | 2.0              |
| BRCA1_ex19_01 | 1.9              |
| BRCA1_ex18_01 | 2.0              |
| BRCA1_ex17_01 | 2.0              |
| BRCA1_ex16_01 | 2.0              |
| BRCA1_ex16_02 | 2.0              |
| BRCA1_ex15_01 | 1.7              |
| BRCA1_ex14_01 | 2.0              |
| BRCA1_ex13_01 | 1.9              |
| BRCA1_ex12_01 | 1.9              |
| BRCA1_ex11_01 | 1.9              |
| BRCA1_ex11_02 | 1.9              |
| BRCA1_ex11_03 | 1.9              |
| BRCA1_ex11_04 | 1.8              |
| BRCA1_ex11_05 | 2.0              |
| BRCA1_ex11_06 | 1.9              |
| BRCA1_ex11_07 | 2.3              |
| BRCA1_ex11_08 | 1.9              |
| BRCA1_ex11_09 | 1.5              |
| BRCA1_ex11_10 | 1.9              |
| BRCA1_ex11_11 | 2.0              |
| BRCA1_ex11_12 | 2.0              |
| BRCA1_ex11_13 | 2.0              |
| BRCA1_ex11_14 | 2.0              |
| BRCA1_ex10_01 | 2.0              |
| BRCA1_ex09_01 | 1.8              |
| BRCA1_ex08_01 | 1.8              |
| BRCA1_ex07_01 | 1.0              |
| BRCA1_ex06_01 | 1.1              |
| BRCA1_ex05_01 | 1.1              |
| BRCA1_ex03_01 | 1.0              |
| BRCA1_ex02_01 | 0.9              |

# Variants Report

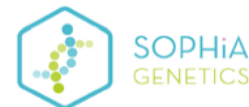

## Variant Report

### Patient

First name:  
Last name:  
Patient ID: **SG10000002**  
DOB: **2 Jan 1967**  
Gender: **Female**  
Father ethnicity: -- Unknown --  
Mother ethnicity: -- Unknown --

### Analysis by

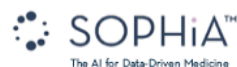

### Analysis

Analysis ID: **40538**  
MID: **S2**  
Request run date:  
Request run name: **HCS by Sophia**

## RESULTS

### SNVs/INDELs (selected in report)

| Gene Transcript                                       | Exon | c.DNA Protein alteration                | Variant Fraction Coverage ( ref / alt ) | Coding consequence | Pathogenicity                       | ClinVar                    |
|-------------------------------------------------------|------|-----------------------------------------|-----------------------------------------|--------------------|-------------------------------------|----------------------------|
| <i>BRCA1</i><br>NM_007294                             | 10   | c.4065.4068delTCAA<br>p.Asn1355Lysfs*10 | 47.3 %<br>( 785 / 709 )                 | frameshift         | Prediction<br>A   Highly Pathogenic | <a href="#">rs80357508</a> |
| comment:<br>The detected variant is highly pathogenic |      |                                         |                                         |                    |                                     |                            |

### SNVs/INDELs (retained)

| Gene Transcript           | Exon | c.DNA Protein alteration       | Variant Fraction Coverage ( ref / alt ) | Coding consequence | Pathogenicity                            | ClinVar                   |
|---------------------------|------|--------------------------------|-----------------------------------------|--------------------|------------------------------------------|---------------------------|
| <i>ATM</i><br>NM_000051   | 3    | c.146C>G<br>p.Ser49Cys         | 51.7 %<br>( 1009 / 1081 )               | missense           | Prediction<br>B   Potentially Pathogenic | <a href="#">rs1800054</a> |
| <i>ATM</i><br>NM_000051   | 40   | c.5948A>G<br>p.Asn1983Ser      | 100.0 %<br>( 0 / 1750 )                 | missense           | Prediction<br>C   Unknown Significance   | <a href="#">rs659243</a>  |
| <i>BARD1</i><br>NM_000465 | 1    | c.70C>T<br>p.Pro24Ser          | 48.75 %<br>( 818 / 778 )                | missense           | Prediction<br>C   Unknown Significance   | <a href="#">rs1048108</a> |
| <i>BARD1</i><br>NM_000465 | 6    | c.1518T>C<br>p.= (p.His506His) | 100.0 %<br>( 0 / 1753 )                 | synonymous         | Prediction<br>C   Unknown Significance   | <a href="#">rs2070093</a> |



# OncoPortal

1

T2  
T4  
D

**EGFR-AS1**  
Missense mutation  
VF: 50.38% depth: 2356

**p.Thr790Met**

**Sensitive**  
Osimertinib mesylate  
Therapeutic agent  
Carcinoma, Non-Small-Cell Lung

Summary:  
EGFR c.2369C>T is a missense mutation in codon 790 yielding a threonine-to-methionine (T790M) amino acid change (J Thorac Oncol 2013, 8(1): 45-51). EGFR is mutated in approximately 12% of non-small cell lung ...  
Clinical Trial(s): 29

2

3

WORKSPACE  
Requests

VIB  
Variant Database Browser

ANALYSIS PM 001234  
#3-0117

PROJECT  
OncoPortal checking

SAMPLE  
#89774 PM 0001234 < 1/6 >

RUN  
23/05/2017

PM 0001234

Overview

Therapeutic

Diagnosis Prognosis

Variants

☒ Diseases  
Carcinoma, Non-Sm...

☒ Gene  
EGFR

☒ Drugs  
EGFR (HER1; erbB1)...

Evidence Levels: 

1/7

1/10

36 Clinical Associations

799 Clinical Trials

T2  
T4  
D

**EGFR**  
Missense mutation  
VF: 50.51% depth: 2548

**p.Thr790Met**

**Sensitive**  
Osimertinib mesylate  
Therapeutic agent  
Carcinoma, Non-Small-Cell Lung

Summary:  
EGFR c.2369C>T is a missense mutation in codon 790 yielding a threonine-to-methionine (T790M) amino acid change (J Thorac Oncol 2013, 8(1): 45-51). EGFR is mutated in approximately 12% of non-small cell lung ...  
Clinical Trial(s): 29

T2  
T4  
D

**EGFR**  
Missense mutation  
VF: 50.51% depth: 2548

**p.Thr790Met**

**Likely resistant**  
Erlotinib hydrochloride  
Therapeutic agent  
Carcinoma, Non-Small-Cell Lung

Summary:  
no summary  
Clinical Trial(s): 0

T2  
T4  
D

**EGFR**  
Missense mutation  
VF: 50.51% depth: 2548

**p.Thr790Met**

**Resistant**  
Erlotinib hydrochloride  
Therapeutic agent  
Carcinoma, Non-Small-Cell Lung

Summary:  
no summary  
Clinical Trial(s): 37

T2  
T4  
D

**EGFR**  
Missense mutation  
VF: 50.51% depth: 2548

**p.Thr790Met**

**Contradictory**  
EGFR (HER1; erbB1) Inhibitors  
Mechanism of action  
Carcinoma, Non-Small-Cell Lung

Summary:  
EGFR c.2369C>T is a missense mutation in codon 790 yielding a threonine to methionine (T790M) amino acid change (J Thorac Oncol 2013, 8(1): 45-51). EGFR is mutated in approximately 12% of non-small cell lung ...  
Clinical Trial(s): 0

T2  
T4  
D

**EGFR**  
Missense mutation

**p.Thr790Met**

**Likely resistant**  
Gefitinib

Summary:  
no summary

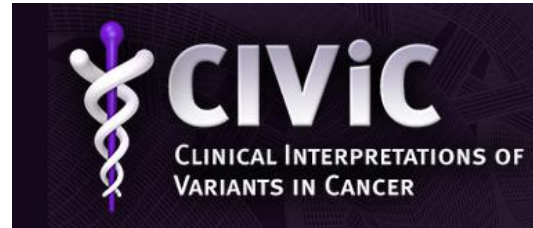

## 2. CIViC

Cites from CIViC [homepage](#) & [nature paper](#):

- "CIViC is an **open access, open source**, community-driven web resource for Clinical Interpretation of Variants in Cancer."
- "CIViC is an **expert-crowdsourced knowledgebase** for Clinical Interpretation of Variants in Cancer describing the therapeutic, prognostic, diagnostic and predisposing relevance of inherited and somatic variants of all types"

CIViC

AboutParticipateCommunityHelpFAQSign In/Sign Up

Go to Genes & VariantsGo!

BROWSE

SEARCH

ACTIVITY

ADD

GENE BRAF

Gene SummaryGene Talk

BRAF mutations are found to be recurrent in many cancer types. Of these, the mutation of valine 600 to glutamic acid (V600E) is the most prevalent. V600E has been determined to be an activating mutation, and cells that harbor it, along with other V600 mutations are sensitive to the BRAF inhibitor dabrafenib. It is also common to use MEK inhibition as a substitute for BRAF inhibitors, and the MEK inhibitor trametinib has seen some success in BRAF mutant melanomas. BRAF mutations have also been correlated with poor prognosis in many cancer types, although there is at least one study that questions this conclusion in papillary thyroid cancer.

Sources:

Li et al., 2009, Oncol. Rep.

Pakneshan et al., 2013, Pathology

Name:

B-Raf proto-oncogene, serine/threonine kinase

Entrez Symbol:

BRAF

Entrez ID:

673

Aliases:

B-RAF1, B-raf, BRAF1, NS7, RAFB1

Chromosome:

7

Start:

140419127

End:

140624564

Strand:

-1

(GRCh37)

Protein Domains:

Diacylglycerol/phorbol-ester binding, Protein kinase C-like, phorbol ester/diacylglycerol-binding domain, Protein kinase domain, Protein kinase, ATP binding site, Protein kinase-like domain... (5 more)

Pathways:

EGFR1, Downstream signaling in naïve CD8+ T cells, CDC42 signaling events, ErbB1 downstream signaling, Signaling events mediated by focal adhesion kinase... (139 more)

View MyGene.info Details

MyGene.info

BRAF Variants & Variant Groups

Show all:filter variants...

599INST

AGK-BRAF

AKAP9-BRAF

AMPLIFICATION

BRAF-CUL1

CUX1-BRAF Fusion

D594A

D594G

D594N

D594V

DEL 485-490

DELNVTAP

F595L

G464V

G466A

G466V

G469A

G469E

G469R

G469V

G496A

G596C

G596R

G596V

G606E

intron 10 rearrangement

intron 9 rearrangement

K483M

K601E

KIAA1549-BRAF

L505H

L597Q

L597R

L597S

L597V

MACF1-BRAF Fusion

MUTATION

N581S

P731T

PAPSS1-BRAF

PPFIBP2-BRAF

TRIM24-BRAF

V600

V600\_K601DELINS

V600D

V600E

V600E AMPLIFICATION

V600E+V600M

V600K

V600R

WASFL-BRAF Fusion

WILD TYPE

ZKSCAN1-BRAF

Other V600's Group

L597R

V600

V600D

BRAF Fusions Group

AGK-BRAF

AKAP9-BRAF

BRAF-CUL1

Kinase Dead BRAF Mutation Group

D594A

D594V

K483M



VARIANT V600D

Variant Summary

Variant Talk

Last Modified by 

CIViC\_Bot

Last Reviewed by 

ahwagner

Last Commented On by 

ahwagner

Aliases: RS121913377 and VAL600ASP

Allele Registry ID: CA457986948

Patients harboring mutations in valine 600 residue of BRAF have been shown to be sensitive to dabrafenib. For more information on the V600 locus, see the V600E entry.

Variant Type:  
Missense Variant

HGVS Expressions:

NC\_000007.13:g.140453135\_140453136delinsAT ,  
NM\_004333.4:c.1799\_1800delTGinsAT ,  
NP\_004324.2:p.Val600Asp ,  
ENST00000288602.6:c.1799\_1800delTGinsAT , and  
NC\_000007.13:g.140453135\_140453136delinsTA

ClinVar ID:  
375939

CIViC Actionability Score:  
25

Ref. Build: GRCh37 Ensembl Version: 75

| Chr. | Start     | Stop      | Ref. s | Var. Bases |
|------|-----------|-----------|--------|------------|
| 7    | 140453135 | 140453136 | CA     | TA         |

Rep. Transcript  
ENST00000288602.6

ClinVar ID

ClinVar Clinical Significance

—

—

COSMIC ID

dbSNP RSID

HGVS ID

—

—

chr7:g.140453135\_140...

SnpEff Effect

SnpEff Impact

gnomAD Adj. AF

synonymous variant

LOW

—

View MyVariant.info Details

MyVariant.info

Evidence for V600D 3 total items

Get Data

Help

| EID  | DESC                              | DIS      | DRUGS       | EL | ET | ED | CS | VO | TR  |  |
|------|-----------------------------------|----------|-------------|----|----|----|----|----|-----|--|
|      |                                   |          |             |    |    |    |    |    |     |  |
| 94   | Patients with other BRAF V60...   | Melanoma | Dabrafenib  | B  |    |    |    |    | 5 ★ |  |
| 4489 | In an in vitro study, the WM26... | Melanoma | Vemurafenib | D  |    |    |    |    |     |  |
| 4488 | In an in vitro study, WM2664, ... | Melanoma | Vemurafenib | D  |    |    |    |    |     |  |

Column Abbreviation   Column Description

**EID Evidence ID Number**

-  Submitted
-  Accepted
-  Rejected
-  Has pending revisions

**DESC Evidence Description**

**DIS Disease**

**DRUG Drug(s)**

**EL Evidence Level**

-  Validated
-  Clinical
-  Case Study
-  Preclinical
-  Inferential

**ET Evidence Type**

-  Predictive
-  Diagnostic
-  Prognostic
-  Predisposing

Column Abbreviation   Column Description

**ED Evidence Direction**

-  Supports
-  Does Not Support

**CS Clinical Significance**

-  Sensitivity/Response
-  Resistance
-  Better Outcome
-  Poor Outcome
-  Positive
-  Negative
-  Adverse Response
-  Reduced Sensitivity
-  Pathogenic
-  Likely Pathogenic
-  Benign
-  Likely Benign
-  Uncertain Significance
-  N/A

**VO Variant Origin**

-  Germline Mutation
-  Somatic Mutation
-  Germline Polymorphism
-  Unknown

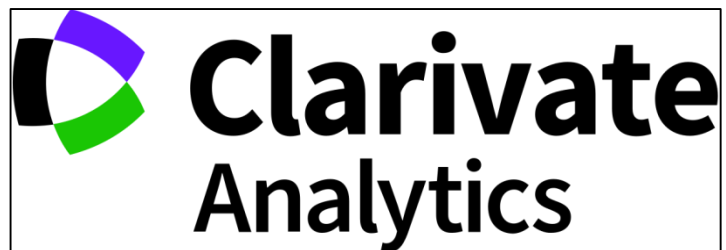

### 3. Clarivate

MetaCore<sup>®</sup> / Key Pathway Advisor<sup>®</sup>

commercial product  
just for comparison with industrial products  
no replacement for cBioPortal

# Übersicht MetaCore

Start Page

Applications ▾

Help ▾

User: deborahriley ▾

Search

Advanced Search



CFTR

Network object

 [Build Network](#)

Table of Contents

General

Gene Details

Protein Details

Thomson Reuters Integrity

External Databases

Vendors

Grouping Variants

**Pathways and Processes**

Diseases

Reactions

Interactions

Human

Mouse

Rat

▼ Gene Details

CFTR

|                                            |                                                                                                                                                                                                                                                                                                                                                                                                                                                                                                                                                                                                                                                                                                                                                                                                                                                                                                                                                                                                                                                                                                             |
|--------------------------------------------|-------------------------------------------------------------------------------------------------------------------------------------------------------------------------------------------------------------------------------------------------------------------------------------------------------------------------------------------------------------------------------------------------------------------------------------------------------------------------------------------------------------------------------------------------------------------------------------------------------------------------------------------------------------------------------------------------------------------------------------------------------------------------------------------------------------------------------------------------------------------------------------------------------------------------------------------------------------------------------------------------------------------------------------------------------------------------------------------------------------|
| Symbols                                    | CFTR, ABC35, ABCC7, CF, CFTR/MRP, dJ760C5.1, MRP7, TNR-CFTR                                                                                                                                                                                                                                                                                                                                                                                                                                                                                                                                                                                                                                                                                                                                                                                                                                                                                                                                                                                                                                                 |
| Full Name                                  | cystic fibrosis transmembrane conductance regulator                                                                                                                                                                                                                                                                                                                                                                                                                                                                                                                                                                                                                                                                                                                                                                                                                                                                                                                                                                                                                                                         |
| Synonyms                                   | cystic fibrosis transmembrane conductance regulator, cystic fibrosis transmembrane conductance regulator (ATP-binding cassette sub-family C, member 7), cAMP-dependent chloride channel, channel conductance-controlling ATPase                                                                                                                                                                                                                                                                                                                                                                                                                                                                                                                                                                                                                                                                                                                                                                                                                                                                             |
| Description                                | This gene encodes a member of the ATP-binding cassette (ABC) transporter superfamily. ABC proteins transport various molecules across extra- and intra-cellular membranes. ABC genes are divided into seven distinct subfamilies (ABC1, MDR/TAP, MRP, ALD, OABP, GCN20, White). This protein is a member of the MRP subfamily that is involved in multi-drug resistance. The encoded protein functions as a chloride channel and controls the regulation of other transport pathways. Mutations in this gene are associated with the autosomal recessive disorders cystic fibrosis and congenital bilateral aplasia of the vas deferens. Alternatively spliced transcript variants have been described, many of which result from mutations in this gene. [provided by RefSeq, Jul 2008]                                                                                                                                                                                                                                                                                                                    |
| Chromosomal Location                       |  <a href="#">Chr7 7q31.2</a>                                                                                                                                                                                                                                                                                                                                                                                                                                                                                                                                                                                                                                                                                                                                                                                                                                                                                                                                                                                               |
| Predicted Target of microRNA by TargetScan |  <a href="#">CFTR</a>                                                                                                                                                                                                                                                                                                                                                                                                                                                                                                                                                                                                                                                                                                                                                                                                                                                                                                                                                                                                      |
| Species                                    |  <a href="#">Homo sapiens</a>                                                                                                                                                                                                                                                                                                                                                                                                                                                                                                                                                                                                                                                                                                                                                                                                                                                                                                                                                                                            |
| Orthologs (Homologenes, NCBI)              |  <a href="#">Canis lupus familiaris</a> ,  <a href="#">Danio rerio</a> ,  <a href="#">Macaca mulatta</a> ,  <a href="#">Mus musculus</a> ,  <a href="#">Rattus norvegicus</a> ,  <a href="#">Gallus gallus</a> ,  <a href="#">Bos taurus</a> ,  <a href="#">Pan troglodytes</a> ,  <a href="#">Xenopus tropicalis</a> |

▼ Protein Details

CFTR\_HUMAN

|      |                                                                  |
|------|------------------------------------------------------------------|
| Name | CFTR_HUMAN / Cystic fibrosis transmembrane conductance regulator |
|------|------------------------------------------------------------------|

MetaCore+MetaDrug™ version 6.33 build 69110

Copyright © 2018 Thomson Reuters

# MetaCore: Map 1

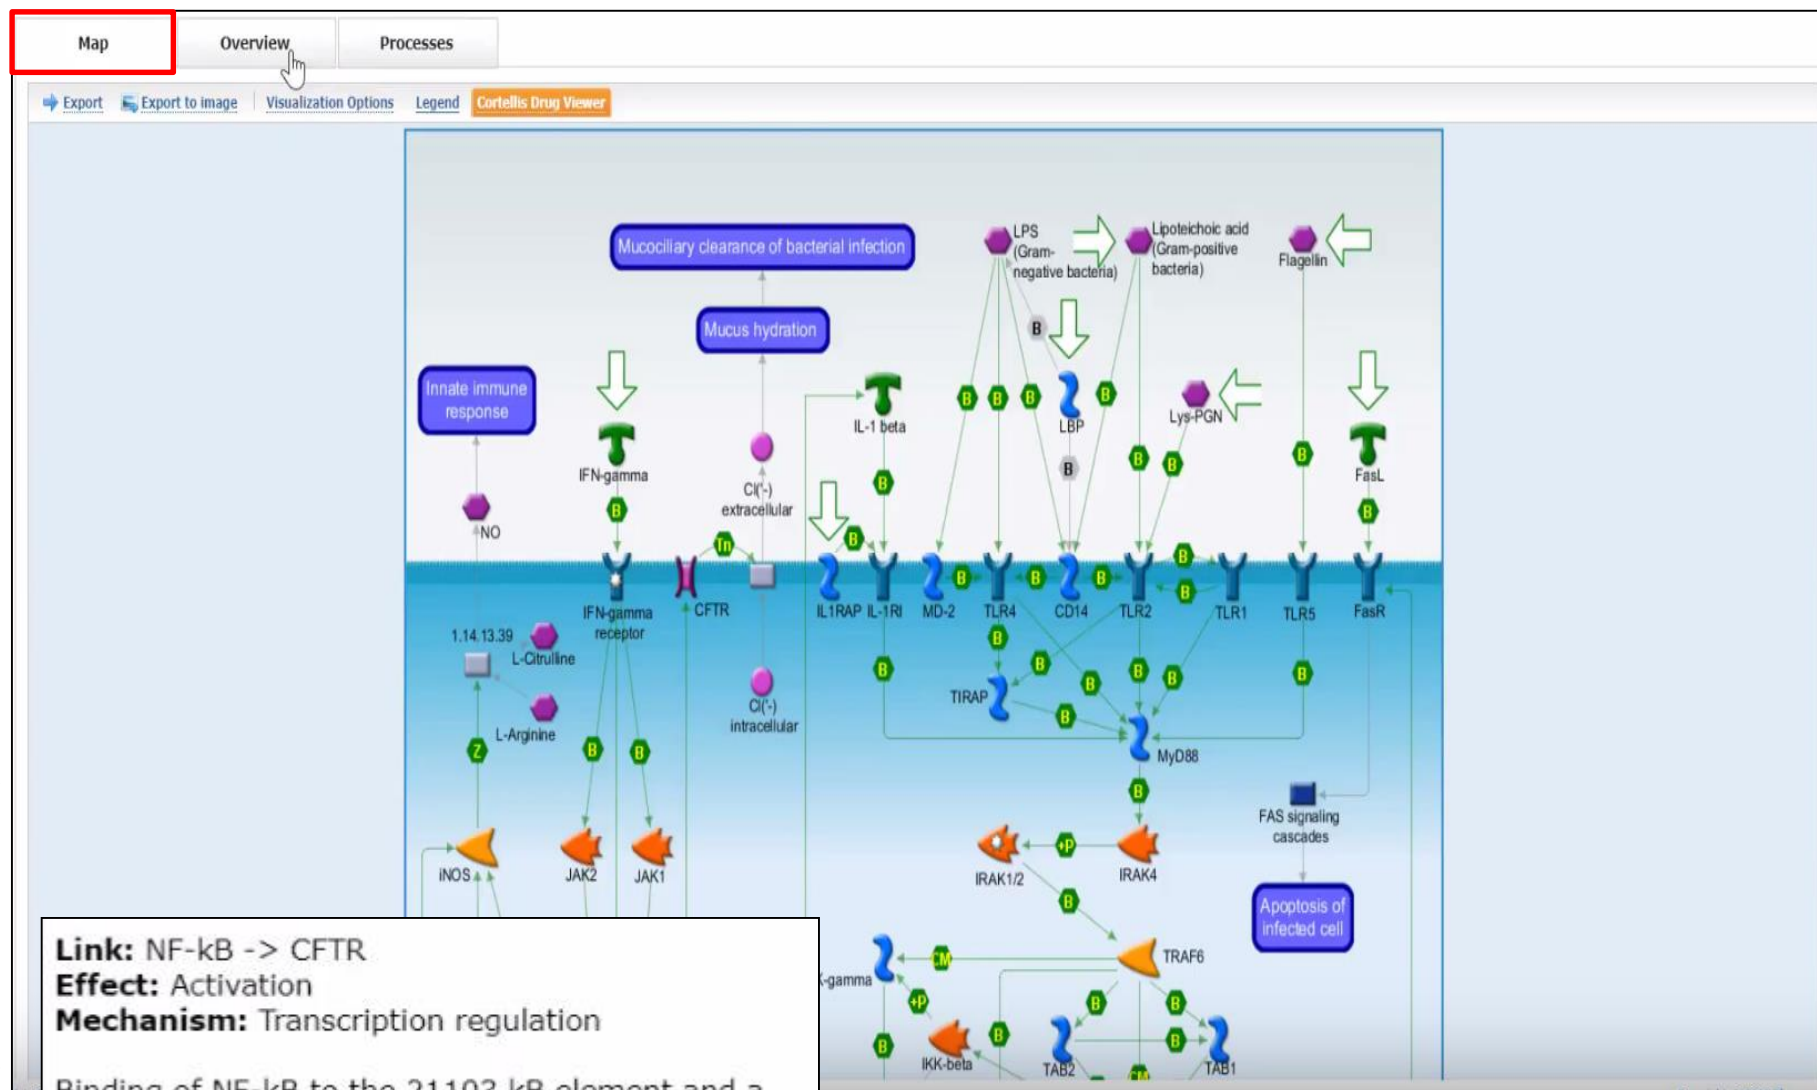



## MetaCore: Map 2

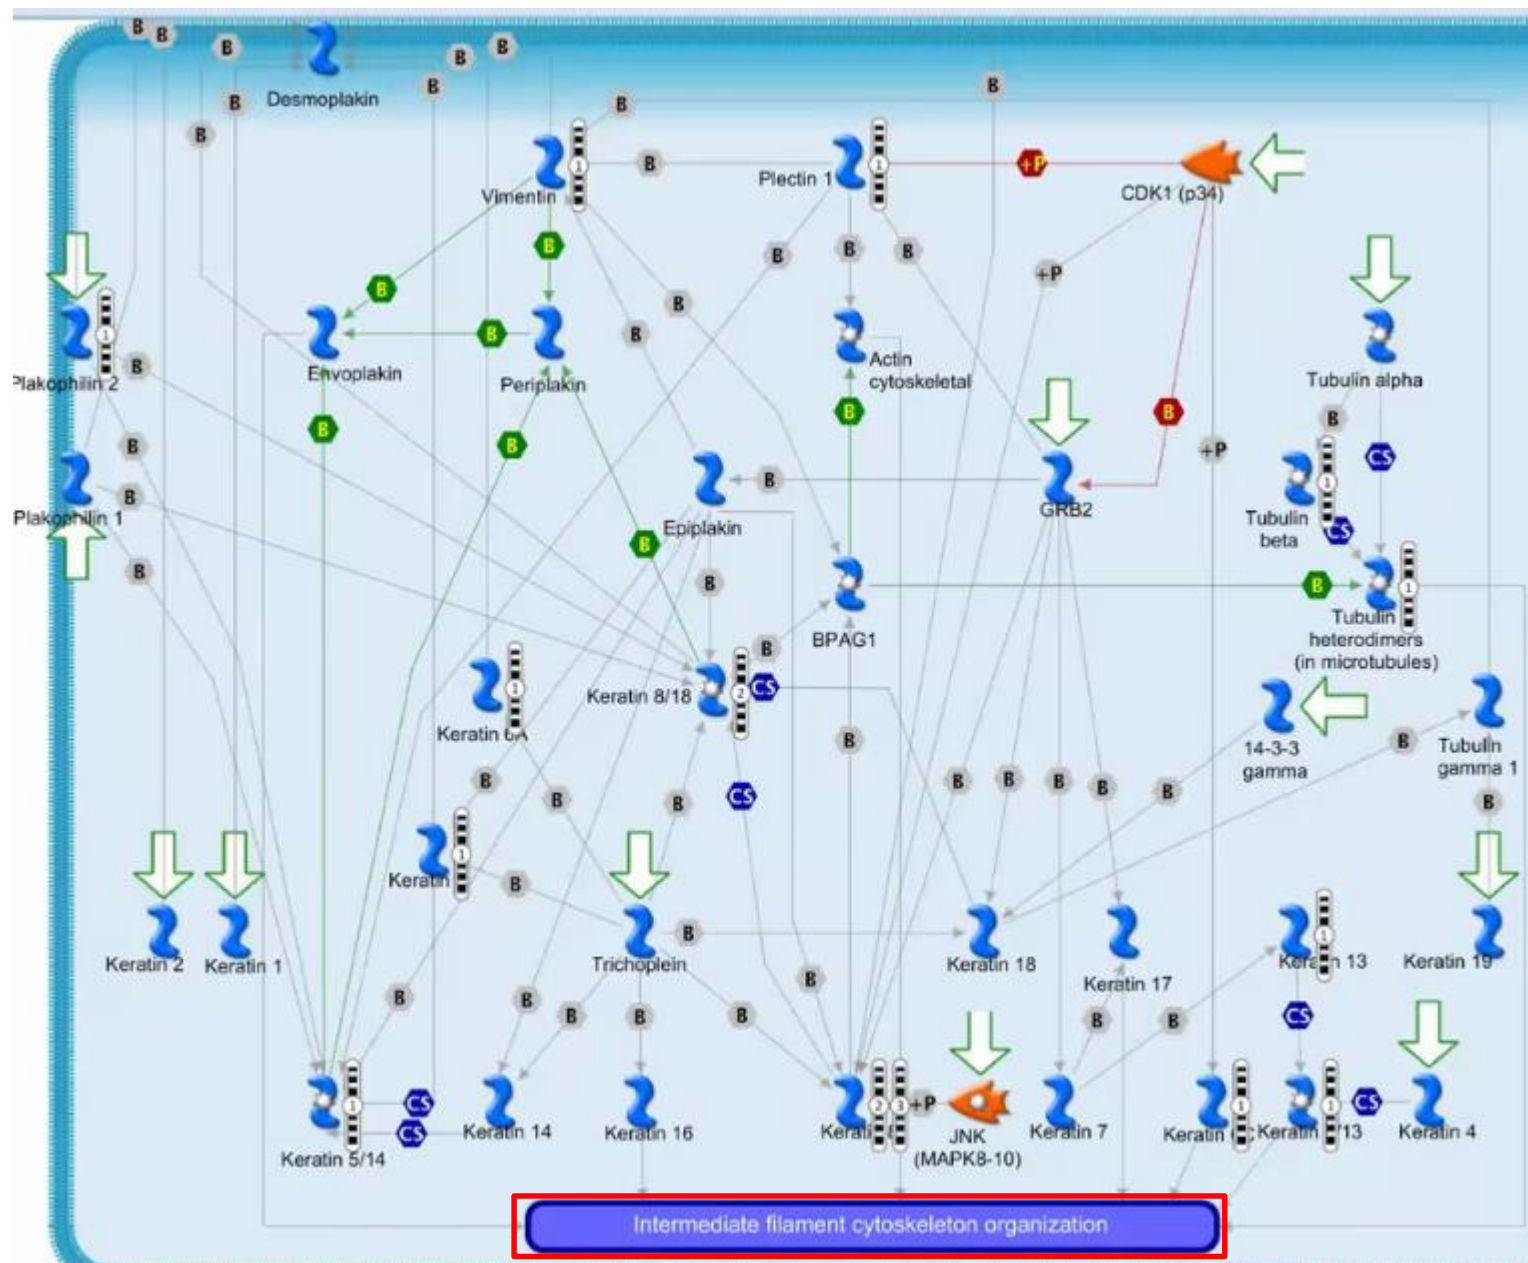

# MetaCore: Map 3

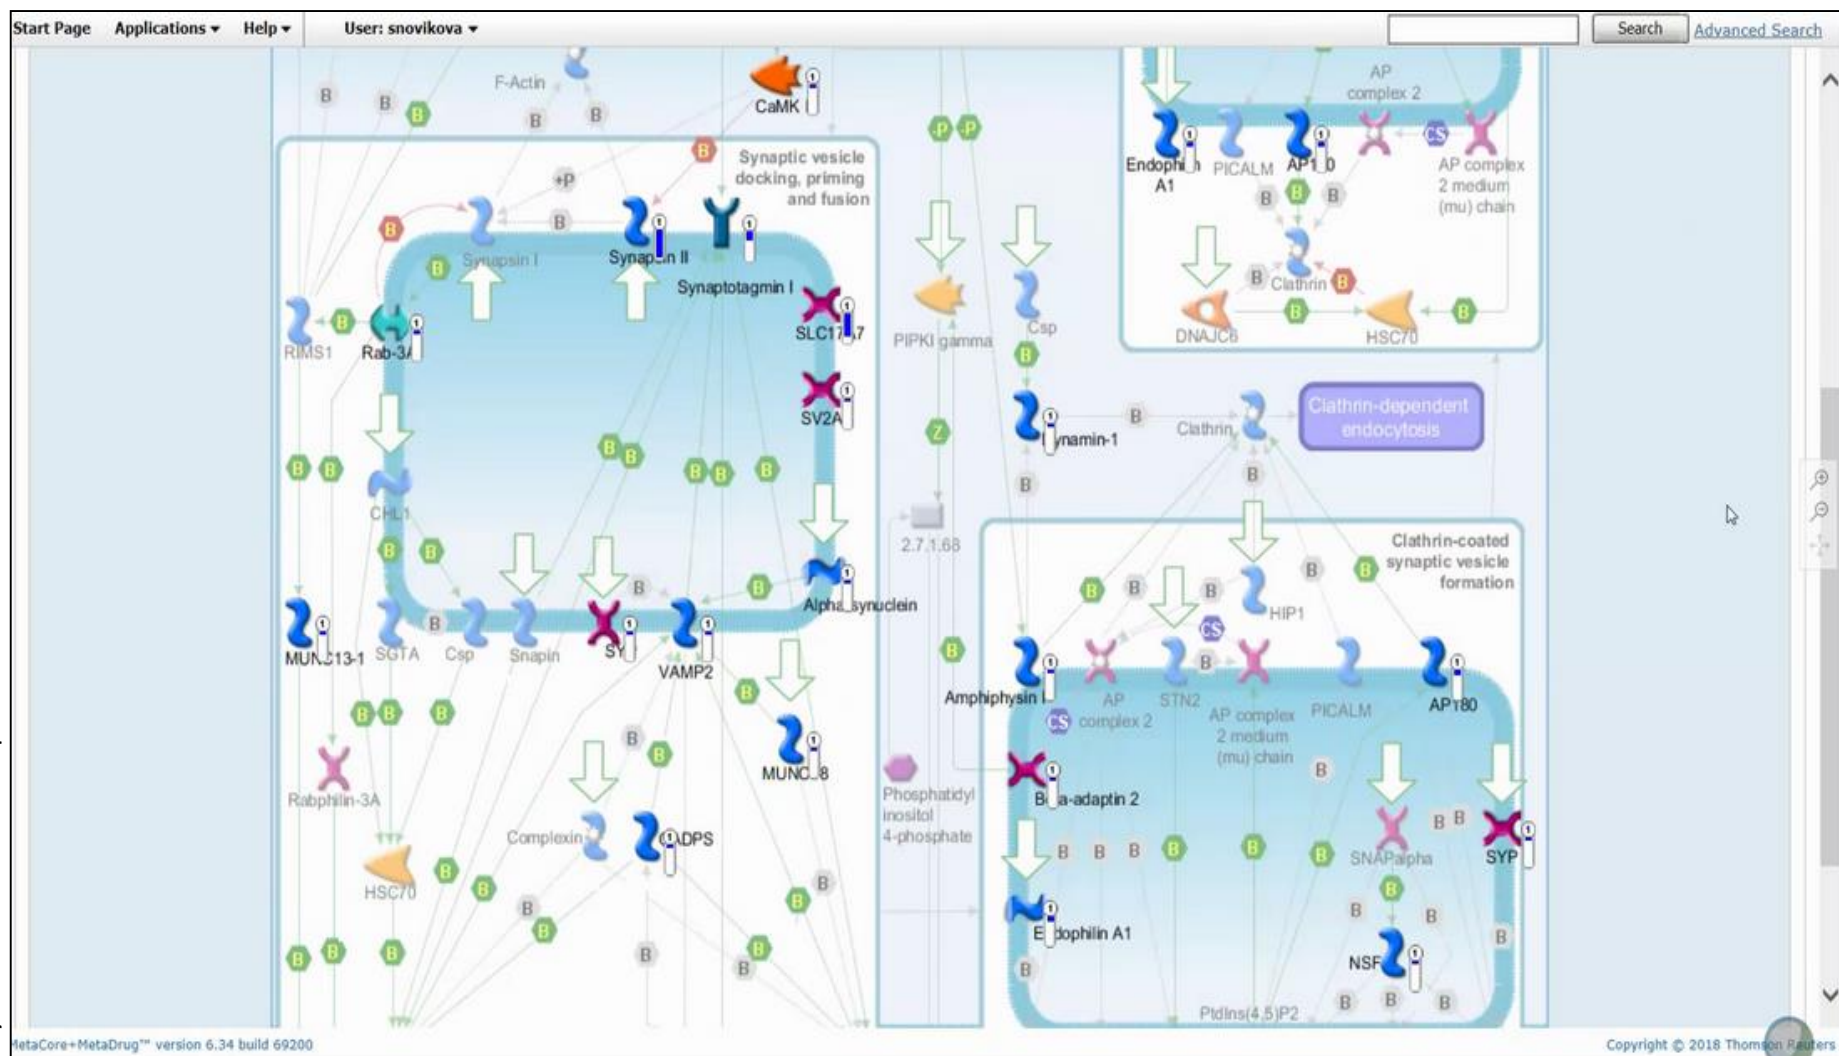

# Übersicht MetaCore

[Start Page](#) [Applications ▾](#) [Help ▾](#) [User: snovikova ▾](#)  [Search](#) [Advanced Search](#)

[Map](#) [Overview](#) [Processes](#)

## Keratin filaments

Cytoskeleton in most eukaryotic cells consists of three distinct, yet interconnected, filament systems: **Actin** filaments, **Microtubules** and intermediate filaments. Cell assembly is integrated by the network of intermediate filaments (IFs) and by their interactions with other cytoskeleton structural elements defining cytoarchitecture and cytodynamics.

IF network is critically involved in cell shape control and imparts intracellular mechanical strength. The family of IF proteins has five sub-families. Four of the sub-families are localized in the cytoplasm, whereas the fifth sub-family is found in the nucleus. Expression patterns of cytoplasmic IFs are cell- and tissue-type specific.

The main IF protein is found in epithelial cells is **Keratin** and in fibroblasts it is **Vimentin**. **Keratin** IFs are obligate co-polymers of acidic and basic cytokeratins [1], [2].

IF networks are cross-linked by special binding proteins, e.g., **Plectin**, **BPAG1**, **Desmoplakin**, **Envoplakin**, **Periplakin**, **Epiplakin**, **Trichoplein** and **Plakophilins** [3], [4], [5], [6]. These proteins maintain cell and tissue integrity by coordinated interconnection of three distinct cytoskeletal filament systems, and anchoring them to membrane complexes.

Assembly, disassembly and subcellular organization of IFs is regulated by kinases, e.g., by Mitogen-activated protein kinases 8-10 (**JNK(MAPK8-10)**) and Cell division cycle 2(**CDK1**) [7], [8].

### Objects list:

|                                    |                                               |
|------------------------------------|-----------------------------------------------|
| <a href="#">14-3-3 gamma</a>       | 14-3-3 protein gamma                          |
| <a href="#">Actin cytoskeletal</a> | Actin cytoskeletal <i>Protein group</i>       |
| <a href="#">BPAG1</a>              | Dystonin                                      |
| <a href="#">CDK1 (p34)</a>         | Cyclin-dependent kinase 1                     |
| <a href="#">Desmoplakin</a>        | Desmoplakin                                   |
| <a href="#">Envoplakin</a>         | Envoplakin                                    |
| <a href="#">Epiplakin</a>          | Epiplakin                                     |
| <a href="#">GRB2</a>               | Growth factor receptor-bound protein 2        |
| <a href="#">JNK(MAPK8-10)</a>      | c-Jun N-terminal kinases <i>Protein group</i> |
| <a href="#">Keratin 1</a>          | Keratin, type II cytoskeletal 1               |
| <a href="#">Keratin 13</a>         | Keratin, type I cytoskeletal 13               |
| <a href="#">Keratin 14</a>         | Keratin, type I cytoskeletal 14               |
| <a href="#">Keratin 16</a>         | Keratin, type I cytoskeletal 16               |

MetaCore+MetaDrug™ version 6.34 build 69200

Copyright © 2018 Thomson Reuters



# MetaCore: Legende

## METACORE QUICK REFERENCE GUIDE

### USER DATA

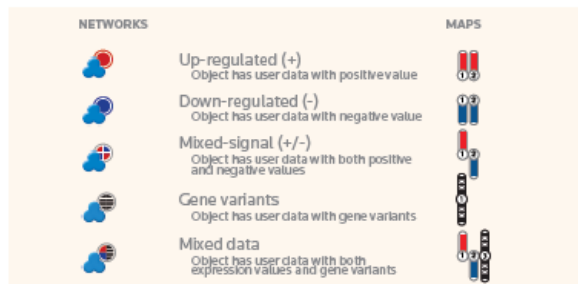

### NETWORK OBJECTS

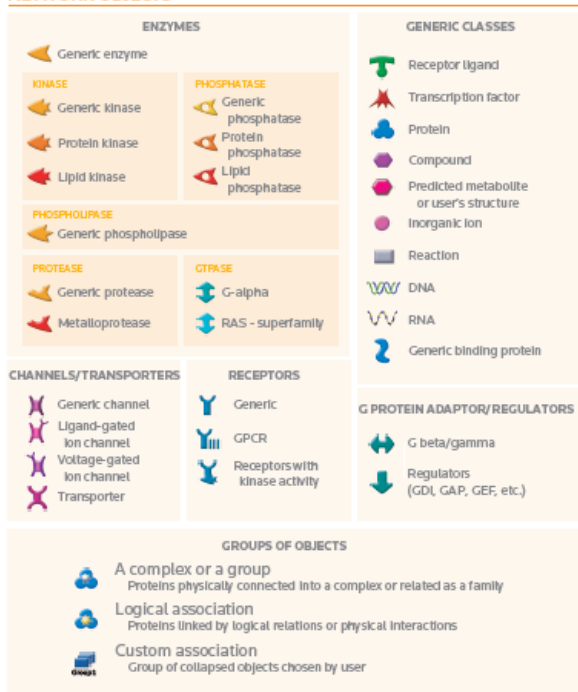

### INTERACTIONS BETWEEN OBJECTS

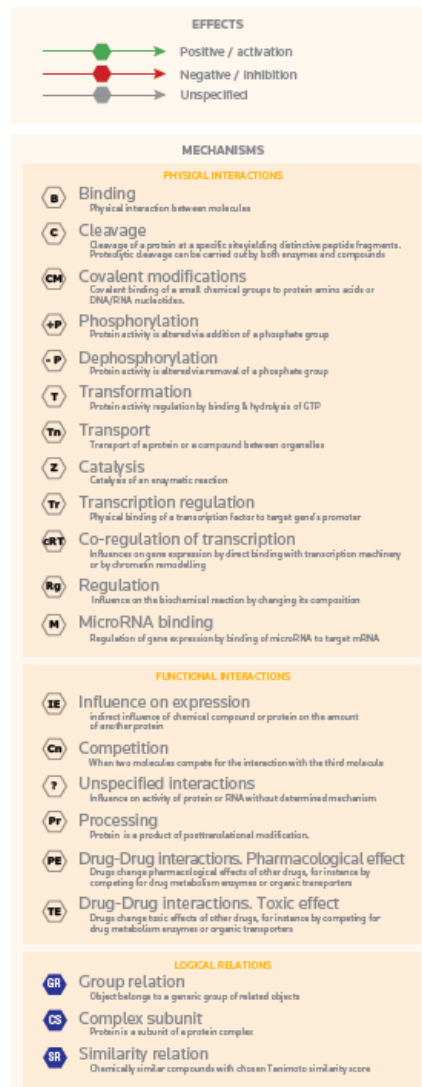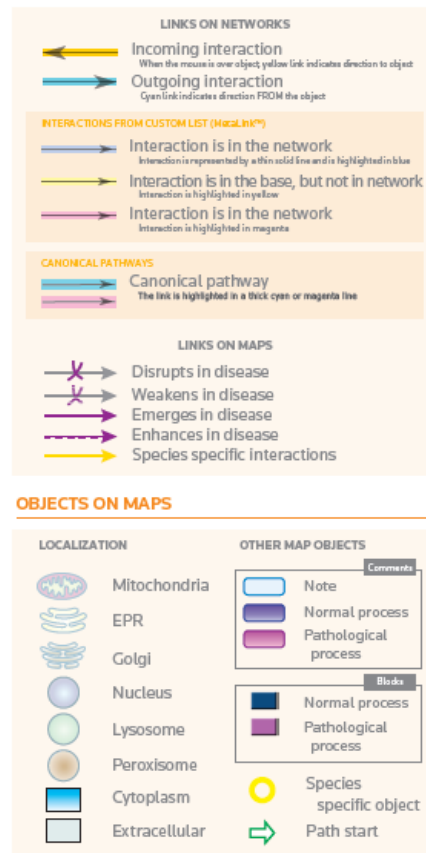

### THOMSON REUTERS REGIONAL OFFICES

#### North America

Philadelphia  
+1 800 336 4474  
+1 215 386 0100

#### Latin America

+55 11 8370 9845

#### Europe, Middle East and Africa

Barcelona +34 93 459 2220  
London +44 20 7433 4000

#### Asia Pacific

Singapore +65 6775 5088  
Tokyo +81 3 5218 6500

Contact us to find out more  
about MetaCore or visit  
[thomsonreuters.com/  
diseasesight](http://thomsonreuters.com/diseasesight)

For a complete office list visit:  
[science.thomsonreuters.com/  
contact](http://science.thomsonreuters.com/contact)

LS0312

Copyright © 2013  
Thomson Reuters

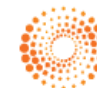

THOMSON REUTERS™

## Powerful analytics – causal reasoning

### KEY HUBS

 Activated or Overconnected object
  Inhibited object

Identify the other proteins which regulate Transcription Factors

Predict Key Hubs on molecular network which drive differential expression

Predict active or inhibited Transcription Factors which change expression of genes

Active

Inhibited

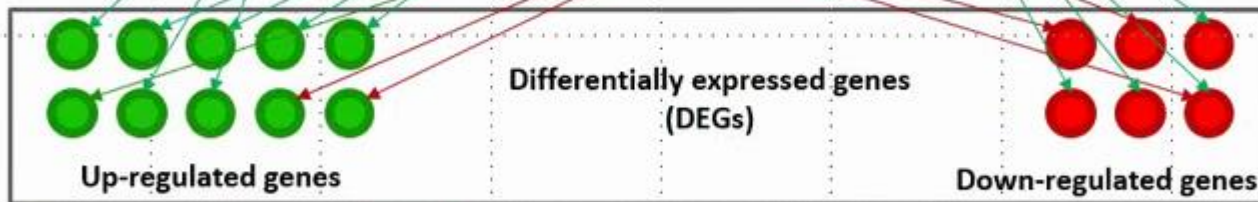

 Documented inhibitory interaction  
 Documented activatory interaction

Up-stream analysis

- Chindelevitch L, Ziemek D, Enayetallah A, Randhawa R, Sidders B, et al. (2012) Causal reasoning on biological networks: interpreting transcriptional changes. *Bioinformatics* 28: 1114-1121.
- Pollard J Jr, Butte AJ, Hoberman S, Joshi M, Levy J, Pappo J. (2005) A computational model to define the molecular causes of type 2 diabetes mellitus. *Diabetes Technol Ther*. 2005 Apr;7(2):323-36.



# Key Pathway Advisor: Entities <-> Interactions

KEY PATHWAY ADVISOR

GSE18105\_colon cancer vs norm / CDK4 - Step 3

?

🔊

📄

Key Hub

Table View

Tutorial

Molecular Entities

Filters (1)

| Name                       | Your Data | Hypothesis Basis | Steps | Putative Biomarkers | Drug Targets | View Interactions |
|----------------------------|-----------|------------------|-------|---------------------|--------------|-------------------|
| CDK4                       | ▲ 4.22    |                  | ▲     |                     | ✓            | →                 |
| E2F4                       |           |                  | 1     |                     | -            | →                 |
| FOXO1                      |           |                  | 1     |                     | -            | →                 |
| p130                       | ▲ 3.84    |                  | 1     |                     | -            | →                 |
| p21                        | ▼ -3.56   |                  | 1     |                     | -            | →                 |
| Rb protein                 |           |                  | 1     |                     | -            | →                 |
| RUNX3                      |           |                  | 1     |                     | -            | →                 |
| ABCG2                      | ▼ -24.75  | Incorrect        | 2     |                     | ✓            | →                 |
| Angiotensinogen            | ▲ 5.08    | Incorrect        | 2     |                     | -            | →                 |
| Aurora-A                   | ▲ 6.61    | Correct          | 2     |                     | ✓            | →                 |
| Aurora-B                   | ▲ 5.08    | Correct          | 2     |                     | ✓            | →                 |
| Axin2                      | ▲ 3.33    | Correct          | 2     |                     | -            | →                 |
| Beta-2 adrenergic receptor | ▼ -3.77   | Correct          | 2     |                     | -            | →                 |

Interactions

Filters (0)

| FROM  | Mechanism                | TO                         |
|-------|--------------------------|----------------------------|
| AP-2A | Transcription regulation | BET1-IG-H3                 |
| AP-2A | Transcription regulation | UNG2                       |
| Bcl-6 | Transcription regulation | TCF7 (TCF1)                |
| c-Myc | Transcription regulation | ACP1                       |
| c-Myc | Transcription regulation | Adenylate cyclase type III |
| c-Myc | Transcription regulation | ATP8A1                     |
| c-Myc | Transcription regulation | AXUD1                      |
| c-Myc | Transcription regulation | BXDC1                      |
| c-Myc | Transcription regulation | C1TM                       |
| c-Myc | Transcription regulation | CGI-30                     |
| c-Myc | Transcription regulation | CLN6                       |
| c-Myc | Transcription regulation | CSE1L                      |
| c-Myc | Transcription regulation | Cyclin J                   |
| c-Myc | Transcription regulation | DOCK10                     |

# Key Pathway Advisor: Putative Biomarkers

**KEY PATHWAY ADVISOR** GSE18105\_colon cancer vs norm / CDK4 - Step 3

Key Hub Table View Tutorial

## Molecular Entities

Filters (1)

| Name                      | Your Data | Hypothesis Basis | Steps | Putative Biomarkers | Drug Targets | View Interactions |
|---------------------------|-----------|------------------|-------|---------------------|--------------|-------------------|
| CDK4                      | 4.22      |                  |       | Perfect             | ✓            | →                 |
| Anus Neoplasms            |           | (Ac) Activity    |       | Perfect             |              | →                 |
| Protein                   |           | (Ab) Abundance   |       |                     |              | →                 |
| CDN1A_HUMAN               | ▼ Ab      |                  |       | Anal Canal          | View         | →                 |
| Colonic Neoplasms         |           | (Ac) Activity    |       | Perfect             |              | →                 |
| Protein                   |           | (Ab) Abundance   |       |                     |              | →                 |
| CDN1A_HUMAN               | ▼ Ab      |                  |       | Intestinal Mucosa   | View         | →                 |
| Colorectal Neoplasms      |           | (Ac) Activity    |       | Perfect             |              | →                 |
| Protein                   |           | (Ab) Abundance   |       |                     |              | →                 |
| CDKN1A_(HUMAN)_transcript | ▼ Ab      |                  |       | Intestine, Large    | View         | →                 |

View Biomarker

## Interactions

Filters (0)

| FROM  | Mechanism                | TO                         |
|-------|--------------------------|----------------------------|
| AP-2A | Transcription regulation | BETA-IG-H3                 |
| AP-2A | Transcription regulation | UNG2                       |
| Bcl-6 | Transcription regulation | TCF7 (TCF1)                |
| c-Myc | Transcription regulation | ACP1                       |
| c-Myc | Transcription regulation | Adenylate cyclase type III |
| c-Myc | Transcription regulation | ATP8A1                     |
| c-Myc | Transcription regulation | AXUD1                      |
| c-Myc | Transcription regulation | BXDC1                      |
| c-Myc | Transcription regulation | C1TM                       |
| c-Myc | Transcription regulation | CGI-30                     |
| c-Myc | Transcription regulation | CLN6                       |
| c-Myc | Transcription regulation | CSE1L                      |
| c-Myc | Transcription regulation | Cyclin J                   |
| c-Myc | Transcription regulation | DOCK10                     |

# Key Pathway Advisor: Putative Biomarkers

## KEY PATHWAY ADVISOR

### YOUR DATA

### KEY HUBS

### KEY PROCESSES

#### Pathway Maps

Pathological Pathway Maps

Physiological Pathway Maps

#### Diseases

#### Process Networks

#### Pathway Groups

### DRUG TARGETS

Similar diseases

### PUTATIVE BIOMARKERS

Similar diseases

### ANALYSIS SETTINGS

GSE18105\_colon cancer vs norm

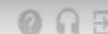

Download Report

## 293 PUTATIVE BIOMARKERS

This analysis compares the direction of your gene expression (or Key Hub activity) with known directional changes manually curated from literature within Key Pathway Advisor database. The database includes biomarker knowledge for DNA, RNA, Protein and post translational modifications levels. This table therefore allows you to understand how your experimental data aligns with current knowledge of these molecules in association with your chosen disease/indication.

How is this score assigned?

Biomarker match score

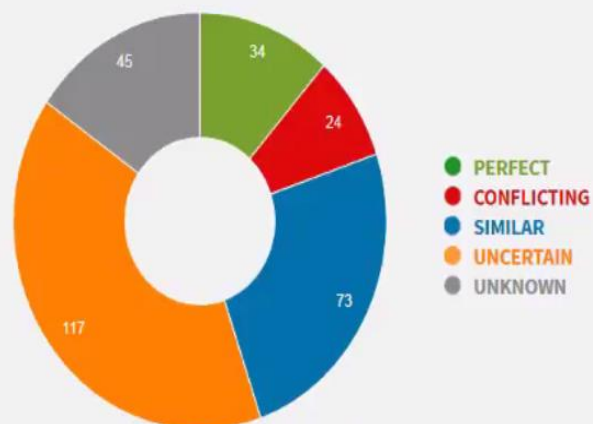

☒ Show only significantly associated (p-value<0.05) with pathology or prognosis.

| Gene    | Selected disease  | Score     |   |
|---------|-------------------|-----------|---|
| ACP1    | Colonic Neoplasms | PERFECT   | + |
| ADAMTS1 | Colonic Neoplasms | PERFECT   | + |
| AGO1    | Colonic Neoplasms | UNCERTAIN | + |

Requirements Analysis and Specification for a Molecular Tumor Board Platform Based on cBioPortal (Buechner P. et al.)  
Supplementary File 4: Presentation of potential tools

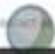

# 4. COMPASS™ for My Geisinger

WHOLE GENOME  
SEQUENCING

Provider Report

Summary of Findings

Resources

SimulConsult Patient Summary

Lab Reports 1 +

Patient Report

Report Overview

Primary Findings 1 +

Additional Findings 1 +

Glossary & General Resources

Summary of Findings

Reason for Testing

Other Key Clinical Findings

Primary Findings 1

Additional Findings 1

PRINT

Patient Information

Sample Information

Whole genome sequencing testing was ordered to identify a possible genetic cause for your symptoms. Your symptoms were reported to include: **Intellectual disability, Seizures with abnormal movements, Stereotypies**

None

MECP2

Clinical Diagnosis: A genetic cause for symptoms was found with a diagnosis of Rett syndrome.

**Rationale:** Variants in MECP2 have been identified in a number of neurodevelopmental disorders that mostly affect girls. These include classic Rett syndrome, atypical Rett syndrome which includes types with preserved expressive language, and milder forms of intellectual disability and autism. MECP2 mutations are usually lethal in boys, however there are reports of boys with MECP2 variants with severe neonatal encephalopathy usually resulting in death in early childhood. Girls with classic Rett syndrome have 6 to 18 months of apparently normal development before developing severe problems with language and communication, learning, coordination, and other brain functions. Early in childhood, affected girls lose purposeful use of their hands and begin making repeated hand wringing, washing, or clapping motions. They tend to grow more slowly than other children and have a small head size (microcephaly). Other signs and symptoms that can develop include breathing abnormalities, seizures, an abnormal side-to-side curvature of the spine (scoliosis), and sleep disturbances. In most cases mutations are de novo although rare cases of multiple affected family members have been reported.

**Pertinent positives:**

- Intellectual disability
- Seizures with abnormal movements
- Stereotypies

**Pertinent negatives:**

**Mode of inheritance:** de novo

**Variants found:**

- NM\_001110792: c.952C>T; R318C; p.318R>C Monoallelic missense

BRCA2

**Rationale:** Adults with HBOC syndrome are at a higher risk to develop breast, ovarian and other cancer than people in the general population. Childhood cancers are NOT known to be associated with HBOC. Some families with HBOC syndrome also have a higher risk for certain other cancers, such as melanoma or pancreatic cancer. While it is possible to have HBOC and never develop cancer, it is important for anyone who has HBOC follow specific early cancer screening and prevention guidelines.

**Mode of inheritance:** Test Autosomal Dominant

**Variants found:**

- NM\_000059: c.2T>G; M1R: p.1Mb>R Monoallelic missense

Confirmatory testing: Whole genome sequencing findings have been confirmed using a standard sequencing method

Sequencing Labs:

Personalis, Inc., Suite 202, 1350 Willow Road, Menlo Park, CA 94025, Phone: (650) 752-1349, Fax: (650) 752-1350

Interpretation Facility:

Genomic Medicine Institute, Geisinger Health System, 100 North Academy Ave, Danville, PA 17822-2620, (570) 214-7941
