# Supplementary material for: Requirements Analysis and Specification for a Molecular Tumor Board Platform Based on cBioPortal
Source: MDPI journal article supplement (doi:10.3390/diagnostics10020093), 2020-02-10
Supplement: s1 [file s1]

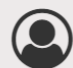

Patient: P04, Male, 22 years old, Glioma, LIVING (61 months)

Low-Grade Gliomas (UCSF, Science 2014).

Samples: 1 P04\_Pri, Primary (Astrocytoma) 2 P04\_Rec1, Recurrence (Anaplastic Astrocytoma) 3 P04\_Rec2, Recurrence (Anaplastic Astrocytoma) 4 P04\_Rec3, Recurrence (Anaplastic Astrocytoma)

« < 3 of 23 patients > »

## Summary

## Clinical Data

## Therapy recommendation

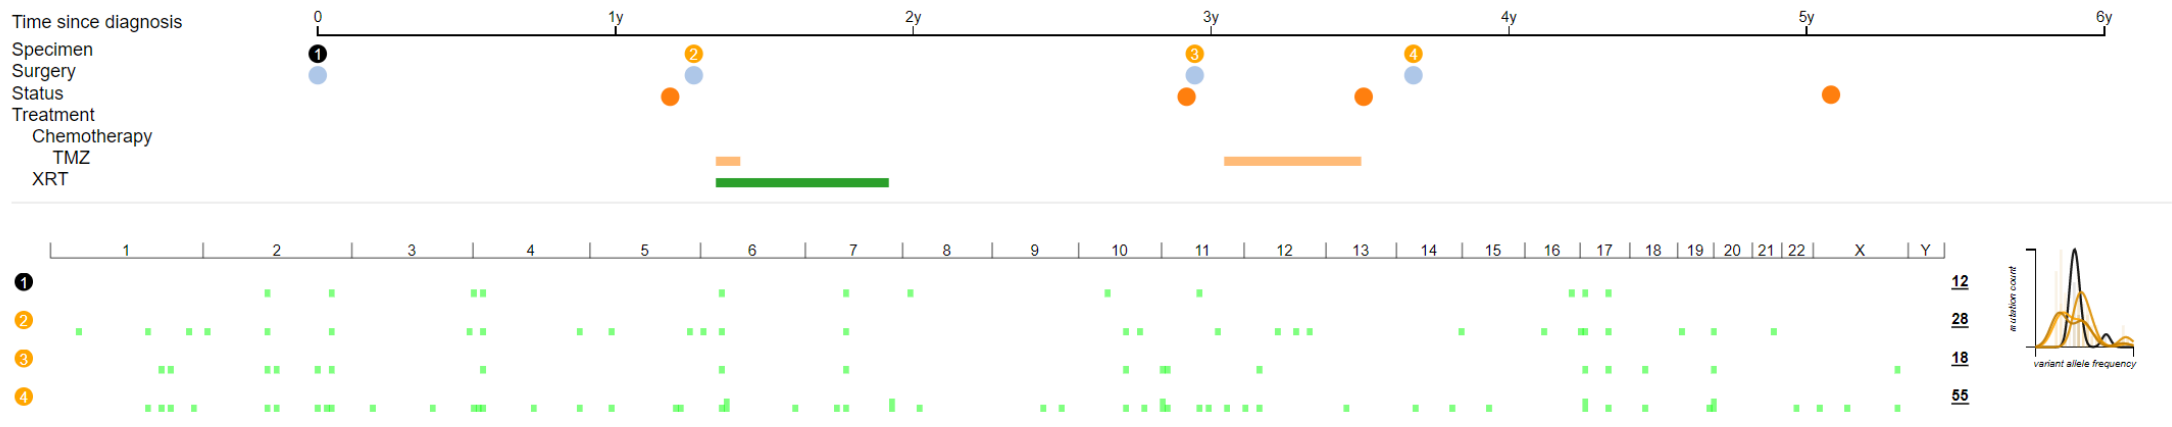

## 80 Mutations (page 1 of 8)

| Tumors  | Gene    | Protein Change | Annotation ▼ | Functional Impact<br>⚠️ | Mutation Type | Allele Freq | Cohort | COSMIC |
|---------|---------|----------------|--------------|-------------------------|---------------|-------------|--------|--------|
| ① ② ③ ④ | IDH1    | R132C          | ⚙️ 🔥 🌐 🌐 🌐   | 🟡 🟡                     | Missense      | ■ ■ ■ ■     | 100.0% | 4964   |
| ① ② ③ ④ | TP53    | R248Q          | ⚙️ 🔥         | 🔴 🔴                     | Missense      | ■ ■ ■ ■     | 90.2%  | 1298   |
| ②       | TDG     | I98Nfs*6       | ○            |                         | FS ins        |             | 1.6%   | 5      |
| ④       | MUC5B   | D682G          | ○            | ●                       | Missense      | ■           | 4.9%   | 4      |
| ②       | ZBED8   | S95L           | ○            | 🔴 🔴                     | Missense      | ■           | 1.6%   |        |
| ②       | DEFB126 | T105Pfs*?      | ○            |                         | FS del        |             | 6.6%   | 1      |
| ③ ④     | GULP1   | R234H          | ○            | ● ●                     | Missense      | ■ ■         | 4.9%   | 1      |
| ④       | FIGNL1  | Y18F           | ○            | ● ●                     | Missense      | ■           | 1.6%   | 4      |
| ④       | MBD4    | E314Kfs*4      | ○            |                         | FS del        |             | 1.6%   |        |
| ④       | RFC3    | I82Lfs*25      | ○            |                         | FS del        |             | 1.6%   |        |

Showing 1-10 of 80 Mutations

[Show more](#)

Copy Number Alterations are not available.

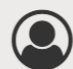

Patient: P04, Male, 22 years old, Glioma, LIVING (61 months)

Samples: 1 P04\_Pri, Primary (Astrocytoma) 2 P04\_Rec1, Recurrence (Anaplastic Astrocytoma) 3 P04\_Rec2, Recurrence (Anaplastic Astrocytoma) 4 P04\_Rec3, Recurrence (Anaplastic Astrocytoma)

3 of 23 patients

## Summary

## Clinical Data Therapy recommendation

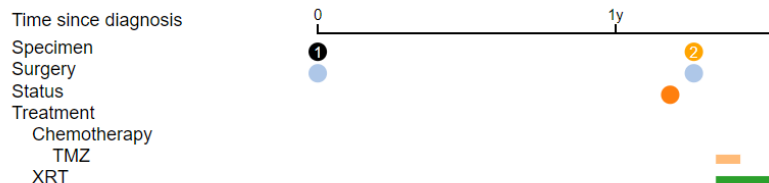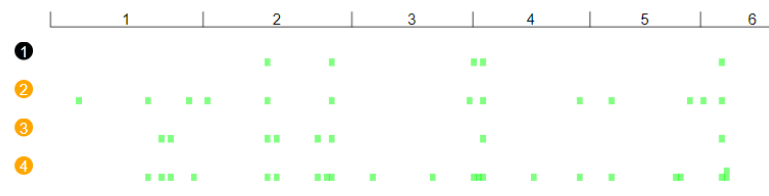

## 80 Mutations (page 1 of 8)

| Tumors  | Gene    | Protein Change   | Annotation |
|---------|---------|------------------|------------|
| ① ② ③ ④ | IDH1    | <i>R132C</i>     | ③          |
| ① ② ③ ④ | TP53    | <i>R248Q</i>     | ③          |
| ②       | TDG     | <i>I98Nfs*6</i>  | ○          |
| ④       | MUC5B   | <i>D682G</i>     | ○          |
| ②       | ZBED8   | <i>S95L</i>      | ○          |
| ②       | DEFB126 | <i>T105Pfs*?</i> | ○          |
| ③ ④     | GULP1   | <i>R234H</i>     | ○          |
| ④       | FIGNL1  | <i>Y18F</i>      | ○          |
| ④       | MBD4    | <i>E314Kfs*4</i> | ○          |
| ④       | RFC3    | <i>I82Lfs*25</i> | ○          |

Sho

## IDH1 R132H in astrocytoma

## CLINICAL IMPLICATIONS

## Oncogenic

### BIOLOGICAL EFFECT

## Switch-of-function

IDH1, a cell metabolism enzyme, is recurrently mutated in various cancers including acute myeloid leukemia and gliomas.

The IDH1 R132H mutation is known to be oncogenic.

There is promising clinical data in patients with IDH1 R132-mutant glioma treated with the IDH1-targeted inhibitor AG-120.

| Level | Alteration(s) | Drug(s)    | Level-associated cancer type(s) | Citation(s)                                                                         |
|-------|---------------|------------|---------------------------------|-------------------------------------------------------------------------------------|
| 3B    | R132C/G/H/Q/S | Ivosidenib | AML                             |  |

*The information above is intended for research purposes only and should not be used as a substitute for professional diagnosis and treatment.*

## Levels

- 1 **FDA-recognized** biomarker predictive of response to an **FDA-approved** drug in **this indication**
- 2A **Standard care** biomarker predictive of response to an **FDA-approved** drug in **this indication**
- 2B **Standard care** biomarker predictive of response to an **FDA-approved** drug in **another indication**, but not standard care for this indication
- 3A **Compelling clinical evidence** supports the biomarker as being predictive of response to a drug in **this indication**, but neither biomarker and drug are standard care
- 3B **Compelling clinical evidence** supports the biomarker as being predictive of response to a drug in **another indication**, but neither biomarker and drug are standard care
- 4 **Compelling biological evidence** supports the biomarker as being predictive of response to a drug, but neither biomarker and drug are standard care
- R1 **Standard care** biomarker predictive of **resistance** to an **FDA-approved** drug in **this indication**

**OncKB**

Feedback

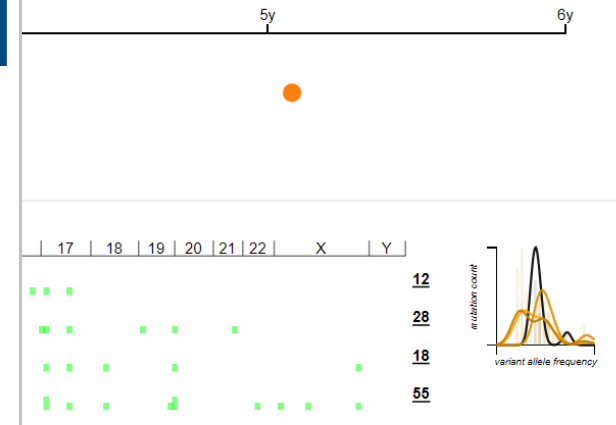

| Allele Freq                                                                           | Cohort | COSMIC |
|---------------------------------------------------------------------------------------|--------|--------|
|    | 100.0% | 4964   |
|    | 90.2%  | 1298   |
|    | 1.6%   | 5      |
|    | 4.9%   | 4      |
|  | 1.6%   |        |
|  | 6.6%   | 1      |
|  | 4.9%   | 1      |
|  | 1.6%   | 4      |
|  | 1.6%   |        |
|  | 1.6%   |        |

Copy Number Alterations are not available.



Patient: P04, Male, 22 years old, Glioma, LIVING (61 months)

Samples: 1 P04\_Pri, Primary (Astrocytoma) 2 P04\_Rec1, Recurrence (Anaplastic Astrocytoma) 3 P04\_Rec2, Recurrence (Anaplastic Astrocytoma) 4 P04\_Rec3, Recurrence (Anaplastic Astrocytoma)

Low-Grade Gliomas (UCSF, Science 2014).

« < 3 of 23 patients > »

## Summary

## Clinical Data Therapy recommendation

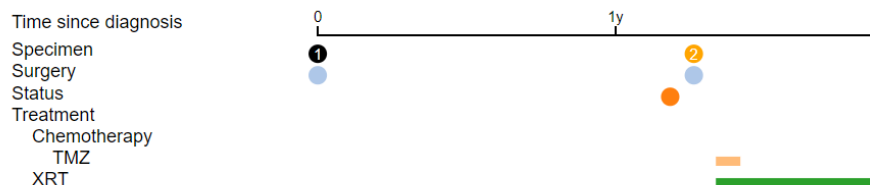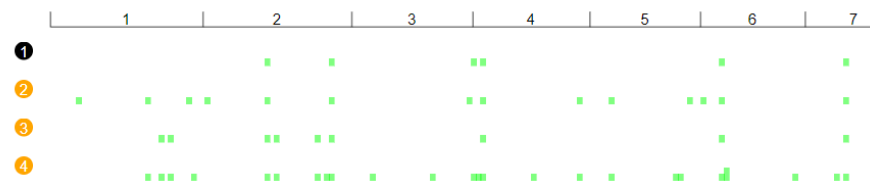

## 80 Mutations (page 1 of 8)

| Tumors  | Gene    | Protein Change   | Annotation ▼                                                                                                                                                                                                                                                                                                                             |
|---------|---------|------------------|------------------------------------------------------------------------------------------------------------------------------------------------------------------------------------------------------------------------------------------------------------------------------------------------------------------------------------------|
| ① ② ③ ④ | IDH1    | <i>R132C</i>     |     |
| ① ② ③ ④ | TP53    | <i>R248Q</i>     |                                                                                                                                                                        |
| ②       | TDG     | <i>I98Nfs*6</i>  |                                                                                                                                                                                                                                                         |
| ④       | MUC5B   | <i>D682G</i>     |                                                                                                                                                                                                                                                         |
| ②       | ZBED8   | <i>S95L</i>      |                                                                                                                                                                                                                                                       |
| ②       | DEFB126 | <i>T105Pfs*?</i> |                                                                                                                                                                                                                                                       |
| ③ ④     | GULP1   | <i>R234H</i>     |                                                                                                                                                                                                                                                       |
| ④       | FIGNL1  | <i>Y18F</i>      |                                                                                                                                                                                                                                                       |
| ④       | MBD4    | <i>E314Kfs*4</i> |                                                                                                                                                                                                                                                       |
| ④       | RFC3    | <i>I82Lfs*25</i> |                                                                                                                                                                                                                                                       |

Showing 1-10 of

Copy Number Alterations are not available.

## Response

**All None**

|                                           |    |
|-------------------------------------------|----|
| <input checked="" type="checkbox"/> Found | 9  |
| <input type="checkbox"/> Not Found        | 38 |
| <input type="checkbox"/> Not Applicable   | 18 |

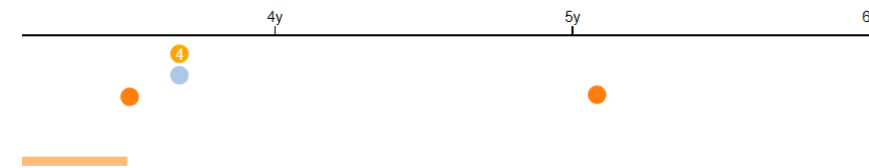

|                                                                                       |                                                                                                              |                                     |
|---------------------------------------------------------------------------------------|--------------------------------------------------------------------------------------------------------------|-------------------------------------|
|    | <b>Cafe Variome</b><br>Hosted by <a href="#">University of Leicester</a>                                     | Found                               |
|    | <b>Cafe Variome Central</b><br>Hosted by <a href="#">University of Leicester</a>                             | Found                               |
|    | <b>Catalogue of Somatic Mutations in Cancer</b><br>Hosted by <a href="#">Wellcome Trust Sanger Institute</a> | Found                               |
|    | <b>Cell Lines</b><br>Hosted by <a href="#">Wellcome Trust Sanger Institute</a>                               | Found                               |
|    | <b>ICGC - Cancer Projects</b><br>Hosted by <a href="#">Ontario Institute for Cancer Research</a>             | Found                               |
|   | <b>Kaviar</b><br>Hosted by <a href="#">Institute for Systems Biology</a>                                     | Found                               |
|  | <b>MyVariant.info</b><br>Hosted by <a href="#">The Scripps Research Institute</a>                            | Found                               |
|  | <b>MyVariant.info - COSMIC</b><br>Hosted by <a href="#">The Scripps Research Institute</a>                   | <a href="#">Show Metadata</a> Found |
|  | <b>MyVariant.info - MutDB</b><br>Hosted by <a href="#">The Scripps Research Institute</a>                    | <a href="#">Show Metadata</a> Found |

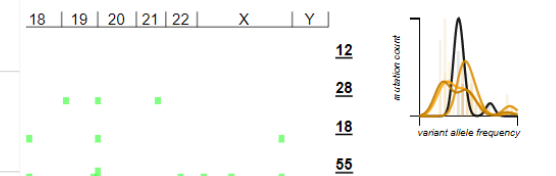

| Freq | Cohort | COSMIC |
|------|--------|--------|
|      | 100.0% | 4964   |
|      | 90.2%  | 1298   |
|      | 1.6%   | 5      |
|      | 4.9%   | 4      |
|      | 1.6%   |        |
|      | 6.6%   | 1      |
|      | 4.9%   | 1      |
|      | 1.6%   | 4      |
|      | 1.6%   |        |
|      | 1.6%   |        |



Patient: P04, Male, 22 years old, Glioma, LIVING (61 months)

Samples: 1 P04\_Pri, Primary (Astrocytoma) 2 P04\_Rec1, Recurrence (Anaplastic Astrocytoma) 3 P04\_Rec2, Recurrence (Anaplastic Astrocytoma) 4 P04\_Rec3, Recurrence (Anaplastic Astrocytoma)

Low-Grade Gliomas (UCSF, Science 2014).

3 of 23 patients

## Summary

Clinical Data    Therapy recommendation

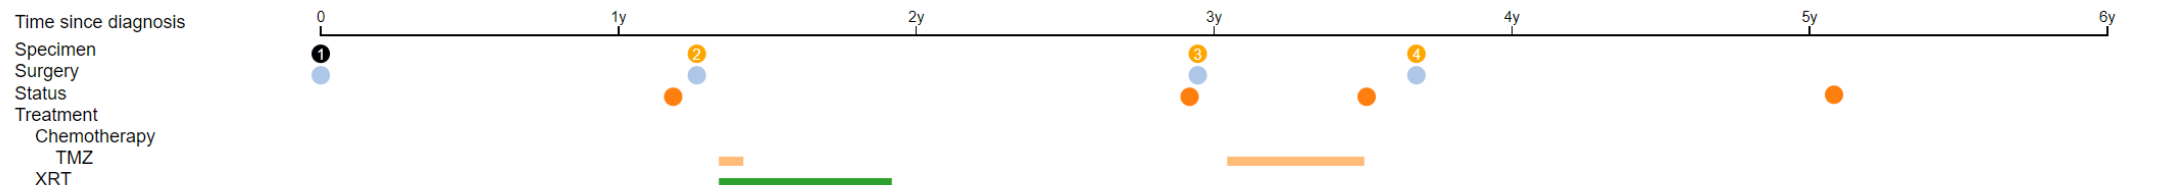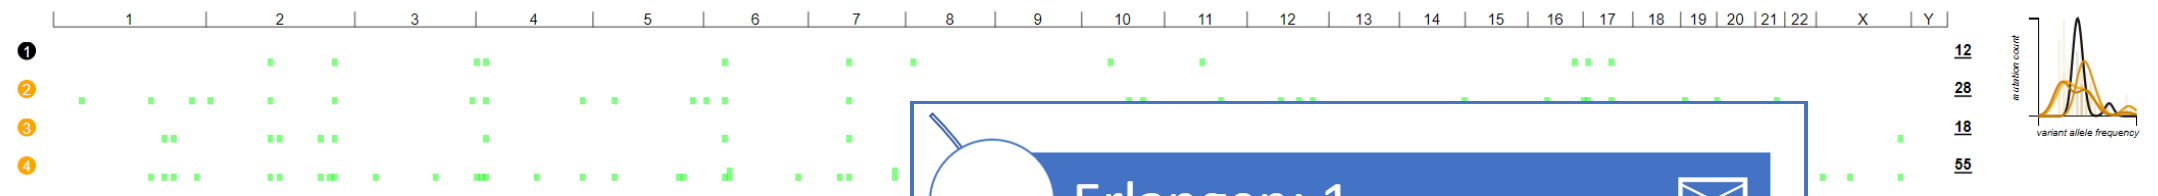

## 80 Mutations (page 1 of 8)

| Tumors  | Gene    | Protein Change | Annotation ▼                                                                                                                                                                                                                                                                                                                                                                                                                 |
|---------|---------|----------------|------------------------------------------------------------------------------------------------------------------------------------------------------------------------------------------------------------------------------------------------------------------------------------------------------------------------------------------------------------------------------------------------------------------------------|
| 1 2 3 4 | IDH1    | R132C          |      |
| 1 2 3 4 | TP53    | R248Q          |                                                                                                                                                                                                                                                           |
| 2       | TDG     | I98Nfs*6       |                                                                                                                                                                                                                                                                                                                                             |
| 4       | MUC5B   | D682G          |                                                                                                                                                                                                                                                                                                                                             |
| 2       | ZBED8   | S95L           |                                                                                                                                                                                                                                                                                                                                             |
| 2       | DEFB126 | T105Pfs*?      |                                                                                                                                                                                                                                                                                                                                             |
| 3 4     | GULP1   | R234H          |                                                                                                                                                                                                                                                                                                                                           |
| 4       | FIGNL1  | Y18F           |                                                                                                                                                                                                                                                                                                                                           |
| 4       | MBD4    | E314Kfs*4      |                                                                                                                                                                                                                                                                                                                                           |
| 4       | RFC3    | I82Lfs*25      |                                                                                                                                                                                                                                                                                                                                           |

Showing 1-10 of 80 Mutations

[Show more](#)

Erlangen: 1

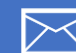

## Freiburg: 3

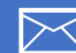

## Frankfurt: 2

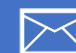

## Missense

## Missense

FS del

FS del

## Cohort

COSMIC

100.0%

4964

90.2%

1298

1.6%

5

4.9%

4

1.6%

6.6%

1

4.9%

1

1.6%

4

1.6%

1.6%

Copy Number Alterations are not available.



[Modify Query](#)**Brain Lower Grade Glioma (TCGA, Provisional)**

All Complete Tumors (283 samples) / 3 Genes

**Gene Set / Pathway is altered in 263 (92.9%) of queried samples**[OncoPrint](#)[Cancer Types Summary](#)[Mutual Exclusivity](#)[Plots](#)[Mutations](#)[Co-Expression](#)[Enrichments](#)[Survival](#)[Network](#)[CN Segments](#)[Download](#)[Bookmark](#)

Case Set: All Complete Tumors (283 patients / 283 samples)

Altered in 263 (93%) of 283 sequenced cases/patients (283 total)

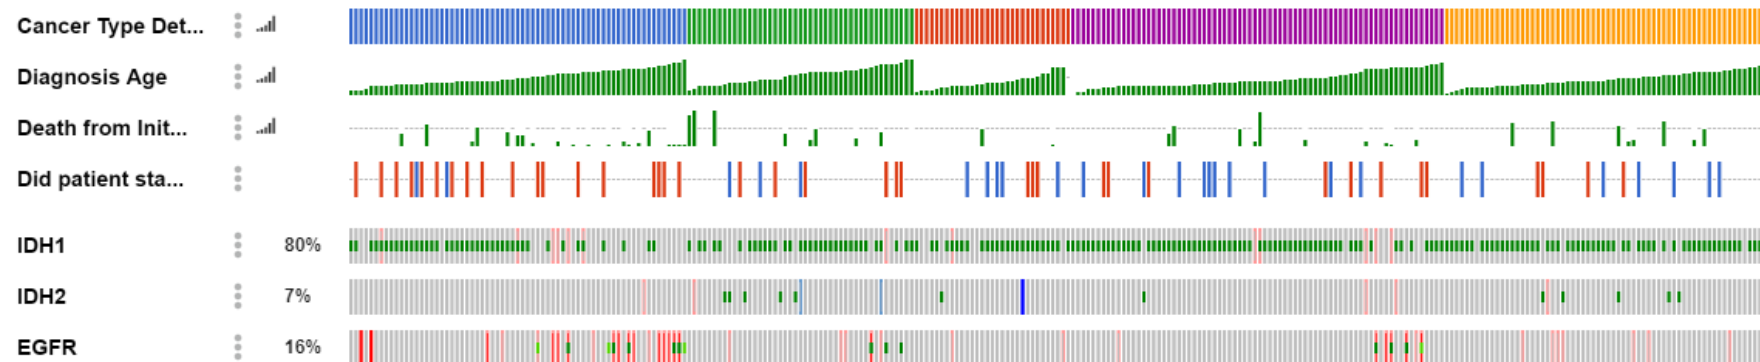

Genetic Alteration

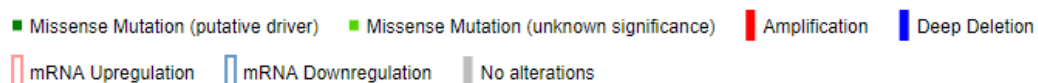

Cancer Type Detailed

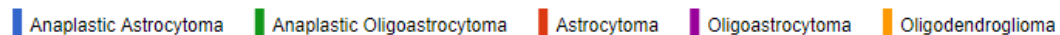

Diagnosis Age

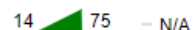

Death from Initial Pathologic Diagnosis Date

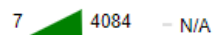

Did patient start adjuvant postoperative radiotherapy?

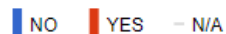

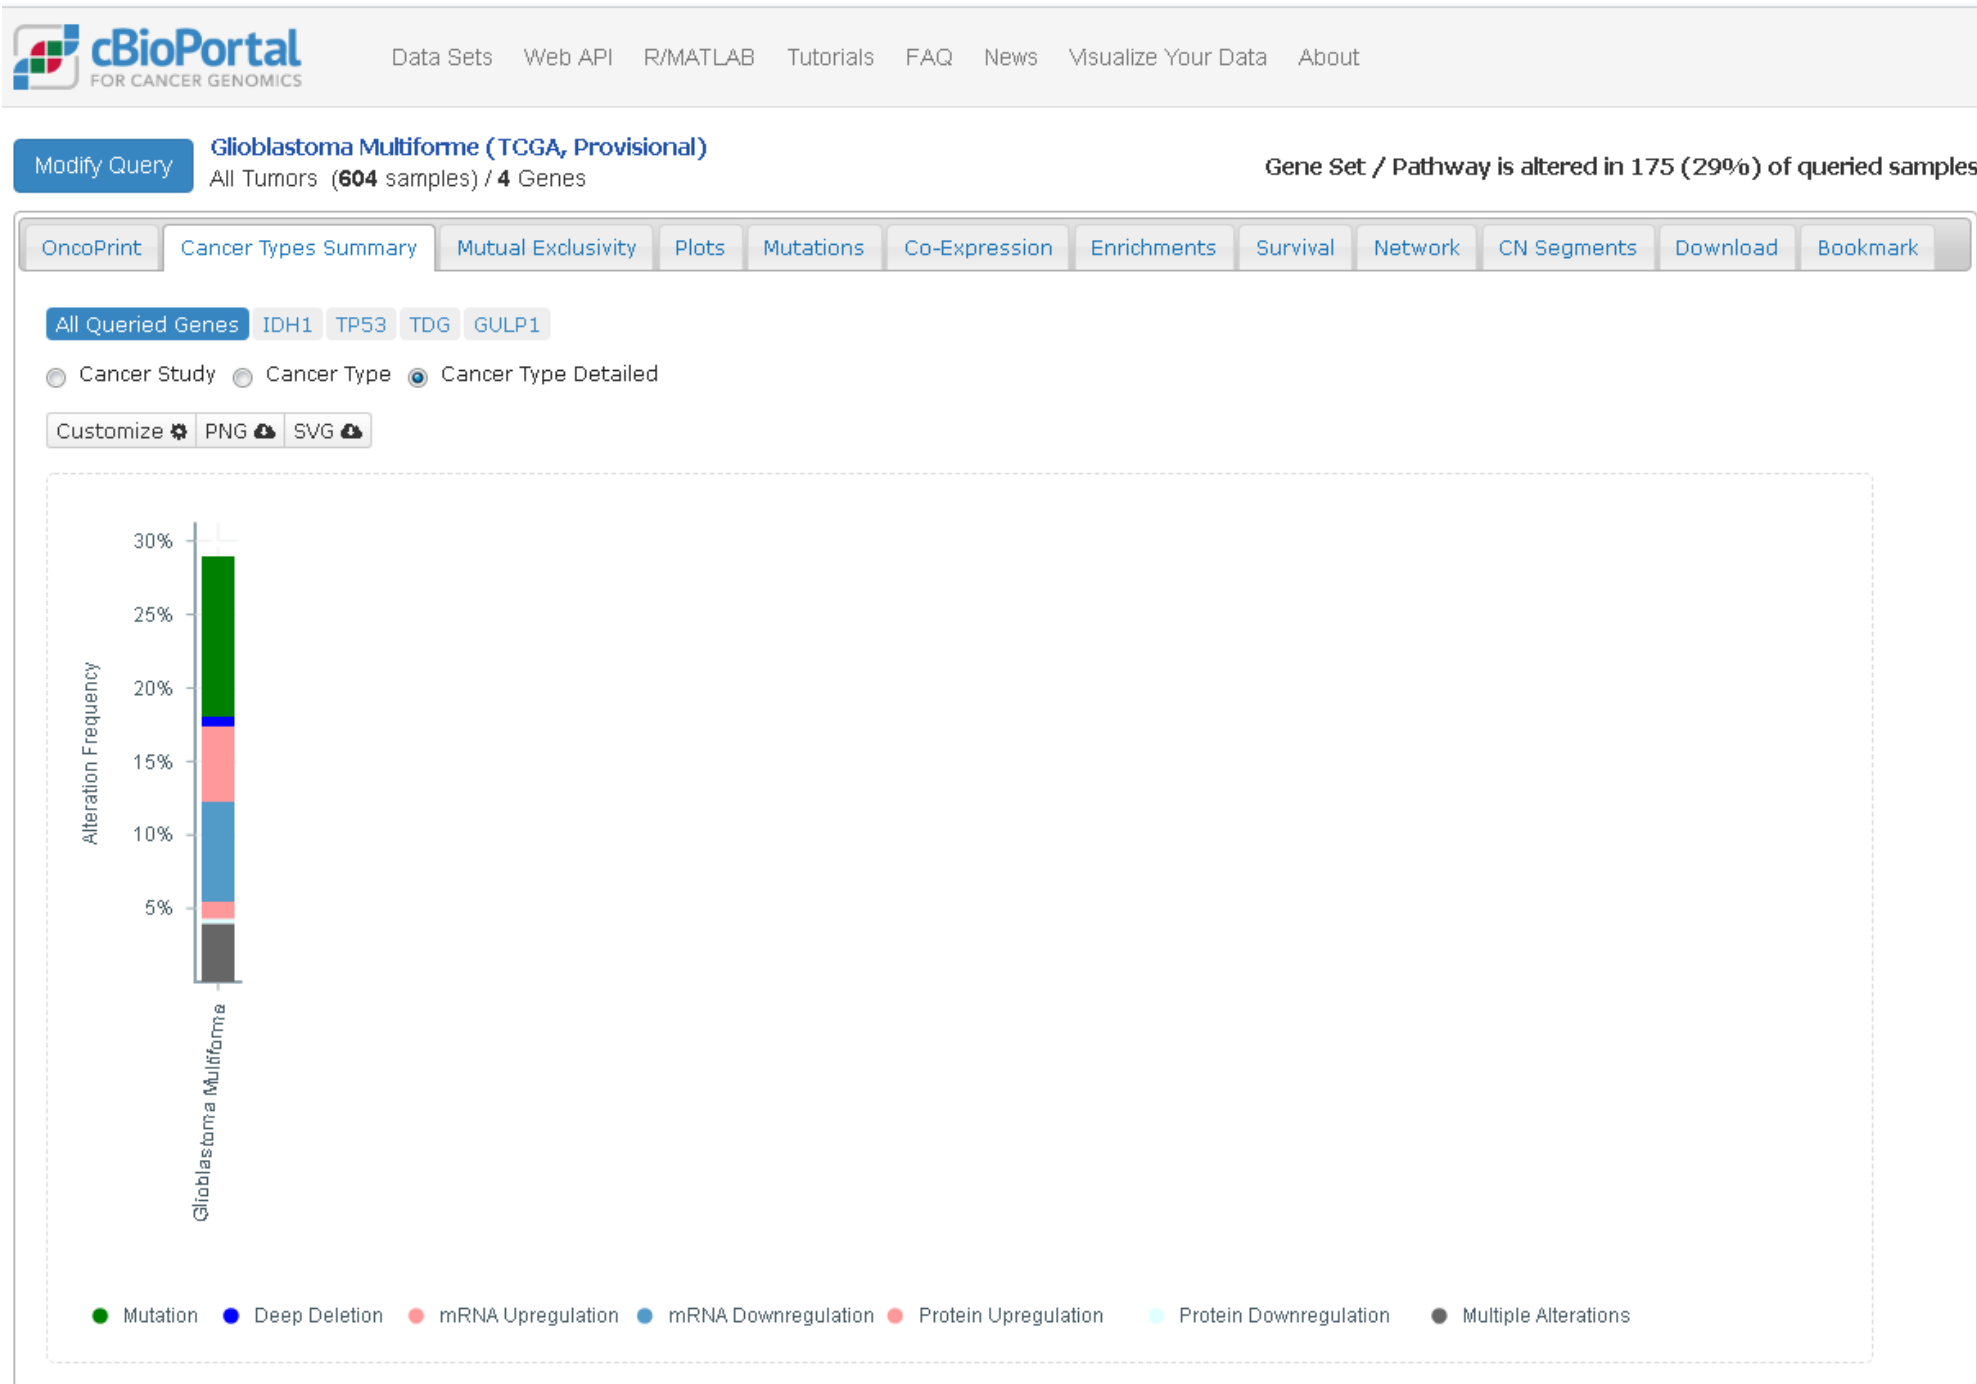

[Modify Query](#)**Glioblastoma Multiforme (TCGA, Provisional)**All Tumors (**604** samples) / **4** Genes

Gene Set / Pathway is altered in 175 (29%) of queried samples

[OncoPrint](#) [Cancer Types Summary](#) [Mutual Exclusivity](#) [Plots](#) [Mutations](#) [Co-Expression](#) [Enrichments](#) [Survival](#) [Network](#) [CN Segments](#) [Download](#) [Bookmark](#)The query contains **no** gene pair with mutually exclusive alterations, and **6** gene pairs with co-occurrent alterations (**1** significant).☒ Mutual exclusivity ☒ Co-occurrence ☐ Significant only  Columns  

| Gene A | Gene B | Neither | A Not B | B Not A | Both | Log Odds Ratio | p-Value | Adjusted p-Value ▲ | Tendency                         |
|--------|--------|---------|---------|---------|------|----------------|---------|--------------------|----------------------------------|
| IDH1   | TP53   | 457     | 22      | 103     | 22   | 1.490          | <0.001  | <0.001             | Co-occurrence <b>Significant</b> |
| TP53   | GULP1  | 470     | 118     | 9       | 7    | 1.131          | 0.030   | 0.179              | Co-occurrence                    |
| IDH1   | TDG    | 533     | 39      | 27      | 5    | 0.929          | 0.074   | 0.446              | Co-occurrence                    |
| TP53   | TDG    | 456     | 116     | 23      | 9    | 0.431          | 0.197   | 1.000              | Co-occurrence                    |
| TDG    | GULP1  | 558     | 30      | 14      | 2    | 0.977          | 0.206   | 1.000              | Co-occurrence                    |
| IDH1   | GULP1  | 546     | 42      | 14      | 2    | 0.619          | 0.328   | 1.000              | Co-occurrence                    |

Showing 1-6 of 6



Bookmark

Profile Name

Apply Log Scale ☒

Download [SVG](#) [PDF](#) [Data](#)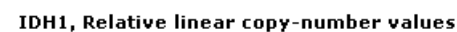

Modify Query

## Brain Lower Grade Glioma (TCGA, Provisional)

All Complete Tumors (283 samples) / 3 Genes

Gene Set / Pathway is altered in 263 (92.9%) of queried samples

OncoPrint

Cancer Types Summary

Mutual Exclusivity

Plots

Mutations

Co-Expression

Enrichments

Survival

Network

CN Segments

Download

Bookmark

IDH1

IDH2

EGFR

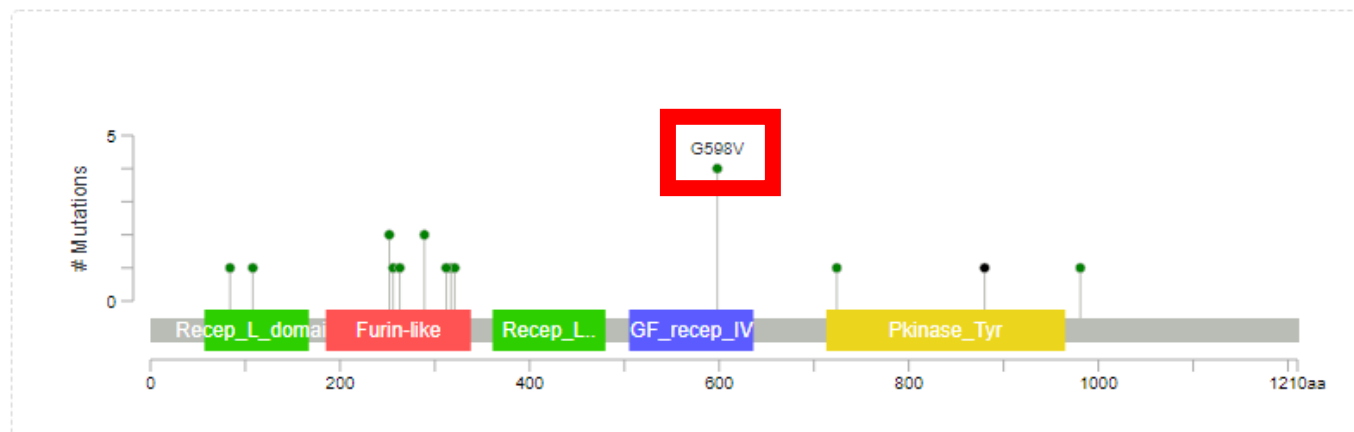

### EGFR

UniProt: [EGFR\\_HUMAN](#)

Transcript: [ENST00000275493](#)

Somatic Mutation Frequency: 5.3% 

**17** Missense **1** Truncating

**0** Inframe

**0** Other

[View 3D Structure](#)

### 18 Mutations (page 1 of 1)

  Columns 

| Sample ID                       | Cancer Type                 | Protein Change | Annotation ▼                                                                                                                                                                                                                                                      | Mutation Type | Copy # | COSMIC | Allele Freq (T) | # Mut in Sample |
|---------------------------------|-----------------------------|----------------|-------------------------------------------------------------------------------------------------------------------------------------------------------------------------------------------------------------------------------------------------------------------|---------------|--------|--------|-----------------|-----------------|
| <a href="#">TCGA-FG-6692-01</a> | Anaplastic Oligoastrocytoma | <b>A289V</b>   |    | Missense      | Amp    | 50     | 0.95            | 59              |
| <a href="#">TCGA-DU-A5TT-01</a> | Anaplastic Oligoastrocytoma | <b>A289V</b>   |    | Missense      | Gain   | 50     | 0.44            | 42              |
| <a href="#">TCGA-HT-8110-01</a> | Anaplastic Astrocytoma      | <b>R108K</b>   |    | Missense      | Amp    | 17     | 0.94            | 24              |
| <a href="#">TCGA-HT-A61C-01</a> | Anaplastic Oligoastrocytoma | <b>T263P</b>   |    | Missense      | Gain   | 7      | 0.23            | 36              |
| <a href="#">TCGA-DU-7013-01</a> | Anaplastic Astrocytoma      | <b>G598V</b>   |    | Missense      | Amp    | 36     | 0.96            | 29              |
| <a href="#">TCGA-DU-8162-01</a> | Oligoastrocytoma            | <b>G598V</b>   |    | Missense      | Amp    | 36     | 0.55            | 18              |
| <a href="#">TCGA-FG-A4MU-01</a> | Oligoastrocytoma            | <b>G598V</b>   |    | Missense      | Amp    | 36     | 0.96            | 55              |
| <a href="#">TCGA-HT-A5RC-01</a> | Anaplastic Astrocytoma      | <b>G598V</b>   |    | Missense      | Amp    | 36     | 0.41            | 46              |
| <a href="#">TCGA-HT-8104-01</a> | Anaplastic Astrocytoma      | <b>G724S</b>   |                                                                                         | Missense      | Amp    | 7      | 0.06            | 49              |



[Data Sets](#) [Web API](#) [R/MATLAB](#) [Tutorials](#) [FAQ](#) [News](#) [Visualize Your Data](#) [About](#)

Modify Query

Brain Lower Grade Glioma (TCGA, Provisional)  
All Complete Tumors (283 samples) / 3 Genes

Gene Set / Pathway is altered in 263 (92.9%) of queried samples

OncoPrint

Cancer Types Summary

Mutual Exclusivity

Plots

Mutations

Co-Expression

Enrichments

Survival

Network

CN Segments

Download

Bookmark

IDH1 IDH2 EGFR



EGFR

UniProt: [EGFR\\_HUMAN](#)

Transcript: [ENST00000275493](#)

Somatic Mutation Frequency: 5.3% 

17 Missense

1 Truncating

0 Inframe

0 Other

View 3D Structure

18 Mutations (page 1 of 1)



Columns 



| Sample ID                       | Cancer Type                 | Protein Change | Annotation                                                                                                                                                                     | Mutation Type | Copy # | COSMIC | Allele Freq (T) | # Mut in Sample |
|---------------------------------|-----------------------------|----------------|-------------------------------------------------------------------------------------------------------------------------------------------------------------------------------------------------------------------------------------------------------------------|---------------|--------|--------|-----------------|-----------------|
| <a href="#">TCGA-FG-6692-01</a> | Anaplastic Oligoastrocytoma | A289V          |    | Missense      | Amp    | 50     | 0.95            | 59              |
| <a href="#">TCGA-DU-A5TT-01</a> | Anaplastic Oligoastrocytoma | A289V          |    | Missense      | Gain   | 50     | 0.44            | 42              |
| <a href="#">TCGA-HT-8110-01</a> | Anaplastic Astrocytoma      | R108K          |    | Missense      | Amp    | 17     | 0.94            | 24              |
| <a href="#">TCGA-HT-A61C-01</a> | Anaplastic Oligoastrocytoma | T263P          |    | Missense      | Gain   | 7      | 0.23            | 36              |
| <a href="#">TCGA-DU-7013-01</a> | Anaplastic Astrocytoma      | G598V          |    | Missense      | Amp    | 36     | 0.96            | 29              |
| <a href="#">TCGA-DU-8162-01</a> | Oligoastrocytoma            | G598V          |    | Missense      | Amp    | 36     | 0.55            | 18              |
| <a href="#">TCGA-FG-A4MU-01</a> | Oligoastrocytoma            | G598V          |    | Missense      | Amp    | 36     | 0.96            | 55              |
| <a href="#">TCGA-HT-A5RC-01</a> | Anaplastic Astrocytoma      | G598V          |    | Missense      | Amp    | 36     | 0.41            | 46              |
| <a href="#">TCGA-HT-8104-01</a> | Anaplastic Astrocytoma      | G724S          |                                                                                         | Missense      | Amp    | 7      | 0.06            | 49              |



Data Sets

Web API

R/MATLAB

Tutorials

FAQ

News

Visualize Your Data

About

Modify Query

Glioblastoma Multiforme (TCGA, Provisional)

All Tumors (604 samples) / 4 Genes

Gene Set / Pathway is altered in 175 (29%) of queried samples

OncoPrint

Cancer Types Summary

Mutual Exclusivity

Plots

Mutations

Co-Expression

Enrichments

Survival

Network

CN Segments

Download

Bookmark

Data Set

mRNA expression (RNA Seq V2 RSEM)

This table lists the genes with the highest expression correlation with the query genes. Click on a row to see the corresponding correlation plot.

IDH1

TP53

TDG

GULP1

Search Gene

Show All

| Correlated Gene | Cytoband | Pearson's Correlation | Spearman's Correlation |
|-----------------|----------|-----------------------|------------------------|
| AFF2            | Xq28     | -0.31                 | -0.37                  |
| GABRA3          | Xq28     | -0.31                 | -0.33                  |
| MECP2           | Xq28     | -0.45                 | -0.47                  |
| ZNF275          | Xq28     | -0.35                 | -0.39                  |
| CD99L2          | Xq28     | -0.36                 | -0.38                  |
| HSFX2           | Xq28     | -0.44                 | -0.45                  |
| PNMA3           | Xq28     | -0.36                 | -0.41                  |
| MAGEC3          | Xq27.2   | -0.37                 | -0.42                  |
| MCF2            | Xq27.1   | -0.35                 | -0.40                  |
| LDOC1           | Xq27.1   | -0.36                 | -0.40                  |
| LINC00632       | Xq27.1   | -0.35                 | -0.41                  |
| SMIM10L2A       | Xq26.3   | -0.37                 | -0.45                  |
| SLC9A6          | Xq26.3   | -0.33                 | -0.35                  |
| HTATSF1         | Xq26.3   | -0.34                 | -0.39                  |
| TRPC5           | Xq23     | -0.31                 | -0.32                  |
| AMOT            | Xq23     | -0.36                 | -0.39                  |
| COL4A5          | Xq22.3   | -0.44                 | -0.46                  |
| COL4A6          | Xq22.3   | -0.34                 | -0.41                  |
| DRP2            | Xq22.1   | -0.35                 | -0.36                  |
| TCEAL2          | Xq22.1   | -0.34                 | -0.34                  |
| GPRASP2         | Xq22.1   | -0.34                 | -0.36                  |
| RAB40AL         | Xq22.1   | -0.31                 | -0.33                  |
| NAP1L3          | Xq21.32  | -0.33                 | -0.35                  |
| FAM133A         | Xq21.32  | -0.31                 | -0.42                  |
| SATL1           | Xq21.1   | -0.34                 | -0.36                  |
| RPS6KA6         | Xq21.1   | -0.34                 | -0.39                  |

mRNA co-expression: IDH1 vs. AFF2

SVG

PDF

Show Mutations

Log Scale X

Log Scale Y

AFF2, mRNA expression (RNA Seq V2 RSEM)

Pearson: -0.31

Spearman: -0.37

IDH1 mutated

AFF2 mutated

Both mutated

Neither mutated

IDH1, mRNA expression (RNA Seq V2 RSEM)

Modify Query

**Glioblastoma Multiforme (TCGA, Provisional)**

All Tumors (604 samples) / 4 Genes

Gene Set / Pathway is altered in 175 (29%) of queried samples

[OncoPrint](#) [Cancer Types Summary](#) [Mutual Exclusivity](#) [Plots](#) [Mutations](#) [Co-Expression](#) [Enrichments](#) [Survival](#) [Network](#) [CN Segments](#) [Download](#) [Bookmark](#)

[Mutations](#) [Copy-number](#) [mRNA](#) [Protein](#)

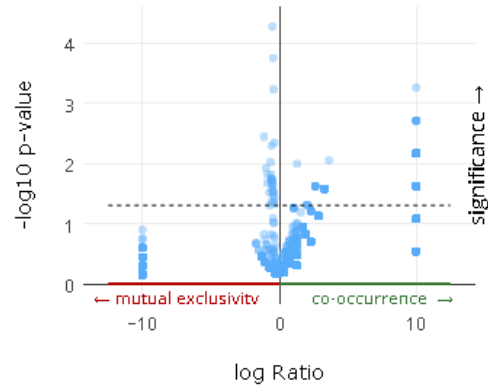

Query Genes: 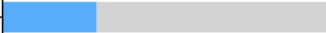  
None selected:   
Select gene in table or volcano plot

Putative copy-number alterations from GISTIC (Deep Deletion)

Add checked genes to query

|                                    |          | <input checked="" type="checkbox"/> Mutual exclusivity <input checked="" type="checkbox"/> Co-occurrence <input type="checkbox"/> Significant |                    | Search Gene |          |         |                    |
|------------------------------------|----------|-----------------------------------------------------------------------------------------------------------------------------------------------|--------------------|-------------|----------|---------|--------------------|
| gene(s)                            |          | Percentage of alteration                                                                                                                      |                    | Log Ratio   | p-Value  | q-Value | Direction/Tendency |
| Gene                               | Cytosand | In altered group                                                                                                                              | In unaltered group |             |          |         |                    |
| <input type="checkbox"/> CDKN2B    | 9p21.3   | 72 (43.11%)                                                                                                                                   | 251 (61.22%)       | -0.51       | 5.358e-5 | 0.348   | Mutual exclusivity |
| <input type="checkbox"/> CDKN2A    | 9p21.3   | 76 (45.51%)                                                                                                                                   | 255 (62.20%)       | -0.45       | 1.773e-4 | 0.348   | Mutual exclusivity |
| <input type="checkbox"/> ATP1B2    | 17p13.1  | 6 (3.59%)                                                                                                                                     | 0 (0.00%)          | >10         | 5.510e-4 | 0.348   | Co-occurrence      |
| <input type="checkbox"/> CDKN2A-DT | 9p21.3   | 76 (45.51%)                                                                                                                                   | 249 (60.73%)       | -0.42       | 5.900e-4 | 0.348   | Mutual exclusivity |
| <input type="checkbox"/> SBF2      | 11p15.4  | 5 (2.99%)                                                                                                                                     | 0 (0.00%)          | >10         | 1.945e-3 | 0.348   | Co-occurrence      |
| <input type="checkbox"/> SWAP70    | 11p15.4  | 5 (2.99%)                                                                                                                                     | 0 (0.00%)          | >10         | 1.945e-3 | 0.348   | Co-occurrence      |
| <input type="checkbox"/> NRIP3     | 11p15.4  | 5 (2.99%)                                                                                                                                     | 0 (0.00%)          | >10         | 1.945e-3 | 0.348   | Co-occurrence      |
| <input type="checkbox"/> RN7SKP50  | 11p15.4  | 5 (2.99%)                                                                                                                                     | 0 (0.00%)          | >10         | 1.945e-3 | 0.348   | Co-occurrence      |
| <input type="checkbox"/> TRIM5     | 11p15.4  | 5 (2.99%)                                                                                                                                     | 0 (0.00%)          | >10         | 1.945e-3 | 0.348   | Co-occurrence      |
| <input type="checkbox"/> WRAP53    | 17p13.1  | 5 (2.99%)                                                                                                                                     | 0 (0.00%)          | >10         | 1.945e-3 | 0.348   | Co-occurrence      |
| <input type="checkbox"/> MIR491    | 9p21.3   | 12 (7.19%)                                                                                                                                    | 64 (15.61%)        | -1.12       | 3.621e-3 | 0.348   | Mutual exclusivity |
| <input type="checkbox"/> MTAP      | 9p21.3   | 73 (43.71%)                                                                                                                                   | 230 (56.10%)       | -0.36       | 4.526e-3 | 0.348   | Mutual exclusivity |
| <input type="checkbox"/> DMRTA1    | 9p21.3   | 38 (22.75%)                                                                                                                                   | 139 (33.90%)       | -0.58       | 5.083e-3 | 0.348   | Mutual exclusivity |
| <input type="checkbox"/> ACCSL     | 11p11.2  | 4 (2.40%)                                                                                                                                     | 0 (0.00%)          | >10         | 6.839e-3 | 0.348   | Co-occurrence      |

Showing 1 to 14 of 12,405 entries

2 3 4 5 ... 887 Next Last

Download Complete Result

[Modify Query](#)

Glioblastoma Multiforme (TCGA, Provisional)

All Tumors (604 samples) / 4 Genes

Gene Set / Pathway is altered in 175 (29%) of queried samples

[OncoPrint](#)[Cancer Types Summary](#)[Mutual Exclusivity](#)[Plots](#)[Mutations](#)[Co-Expression](#)[Enrichments](#)[Survival](#)[Network](#)[CN Segments](#)[Download](#)[Bookmark](#)

The network below contains 54 nodes, including your 4 query genes and the 50 most frequently altered neighbor genes (out of a total of 228).  
Download the complete network in [GraphML](#) or [SIF](#) for import into [Cytoscape](#) ([GraphMLReader plugin](#) is required for importing GraphML).

[File](#)[Topology](#)[View](#)[Layout](#)[Legends](#)

Double-click nodes/edges for details. Right-click edges for detailed process-level network view.

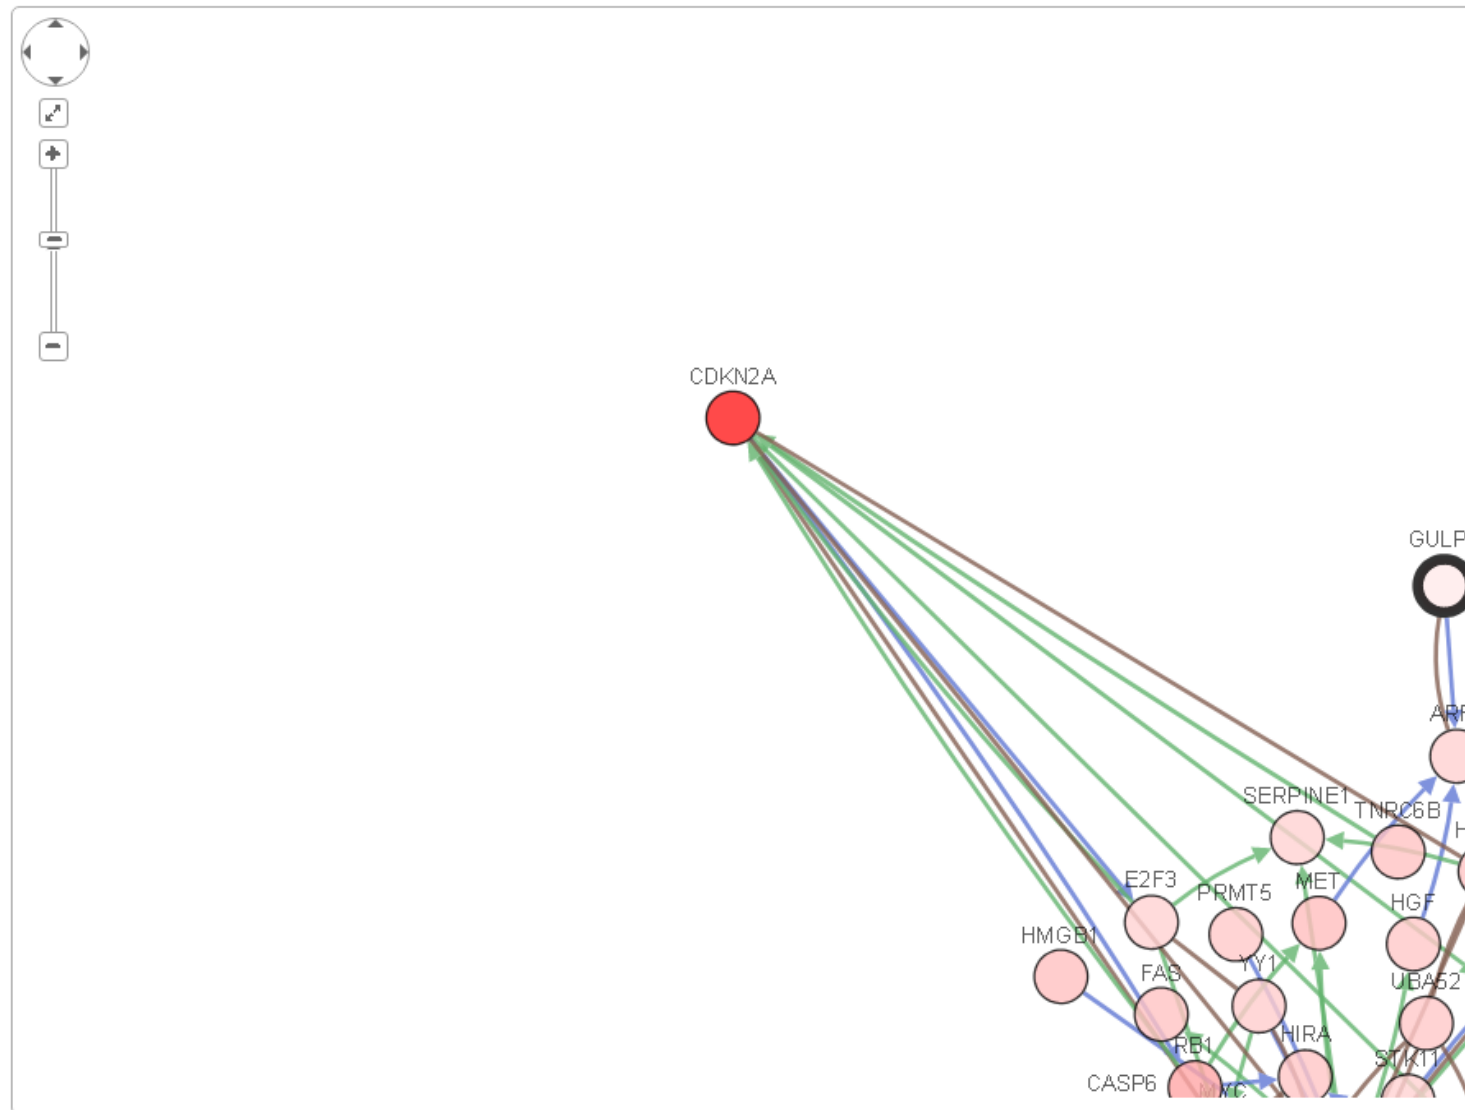[Genes](#)[Interactions](#)[Details](#)[Help](#)

Drugs of Specified Genes

Hide Drugs

Genes

Filter Neighbors by Alteration (%)

0  MAX 0   

Submit New Query

|         |
|---------|
| ACAP2   |
| ARF6    |
| ARID3A  |
| BCL2L1  |
| BCL2L2  |
| BCL6    |
| BID     |
| BTG2    |
| CARM1   |
| CASP1   |
| CASP6   |
| CDK5    |
| CDKN2A  |
| COL18A1 |
| CSNK1G2 |
| DAPK3   |
| DDB2    |
| E2F3    |
| FAS     |
| GULP1   |
| HGF     |
| HIF1A   |
| HIRA    |
| HMGB1   |
