# Supplementary material for: Requirements Analysis and Specification for a Molecular Tumor Board Platform Based on cBioPortal
Source: MDPI journal article supplement (doi:10.3390/diagnostics10020093), 2020-02-10
Supplement: s1 [file s1]

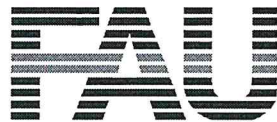

FRIEDRICH-ALEXANDER  
UNIVERSITÄT  
ERLANGEN-NÜRNBERG  
MEDIZINISCHE FAKULTÄT

Ethik-Kommission der FAU • Krankenhausstr. 12 • 91054 Erlangen

Jan Christoph, M. Sc.  
Friedrich Alexander Universität  
Lehrstuhl für Medizinische Informatik  
Am Wetterkreuz 13  
91058 Erlangen

#### Ethik-Kommission

##### Vorsitzender:

Prof. Dr. med. Renke Maas

##### Stellv. Vorsitzende:

Prof. Dr. med. Kerstin Amann

##### Geschäftsstelle:

Krankenhausstr. 12, 91054 Erlangen

Telefon: +49 9131 85-22270

+49 9131 85-26210

Fax: +49 9131 85-26021

E-Mail: [ethikkommission@fau.de](mailto:ethikkommission@fau.de)

Internet: [www.ethikkommission.fau.de](http://www.ethikkommission.fau.de)

Erlangen, 18.02.2019/VK

Antrag Nr.: **34\_19 B** (bitte bei Schriftwechsel angeben)

#### Beratung nach § 15 Berufsordnung für Ärzte in Bayern

|                |                                                                                                                                  |
|----------------|----------------------------------------------------------------------------------------------------------------------------------|
| Studientitel:  | Stakeholder analysis and requirement specification for a Molecular Tumorboard platform                                           |
| Antragsteller: | Jan Christoph, M. Sc., Friedrich Alexander Universität, Lehrstuhl für Medizinische Informatik, Am Wetterkreuz 13, 91058 Erlangen |

Sehr geehrter Herr Christoph, M. Sc.,

die Ethik-Kommission hat Ihren Antrag vom 29.01.2019 auf der Basis der Unterlagen in Anhang 1 geprüft.

#### Die Ethik-Kommission erhebt keine Einwände gegen die Durchführung der Studie.

##### Allgemeine Hinweise:

Auch bei einer positiven Beurteilung des Vorhabens durch die Ethik-Kommission der Medizinischen Fakultät der Friedrich-Alexander-Universität Erlangen-Nürnberg verbleibt die ärztliche und juristische Verantwortung für die Durchführung des Projekts uneingeschränkt bei Ihnen und Ihren Mitarbeitern/innen. Sollten sich zu diesem Projekt ethisch relevante Nachträge ergeben, bitte ich Sie, diese der Ethik-Kommission unverzüglich zusammen mit einer Bewertung der Nutzen-Risiko-Relation bekannt zu geben. Änderungen in den Dokumenten sind zum Zweck einer beschleunigten Bearbeitung deutlich zu kennzeichnen. Das Ende der Studie ist anzuzeigen und das Ergebnis zu gegebener Zeit in angemessener Form der Ethik-Kommission mitzuteilen.

Die Gültigkeit des Votums der Ethik-Kommission ist an die im Antrag angegebene Laufzeit der Studie gebunden. Wird keine Laufzeit angegeben, ist die Gültigkeit des Votums auf fünf Jahre begrenzt.

Mit freundlichen Grüßen

Prof. Dr. med. Renke Maas  
Vorsitzender der Ethik-Kommission

#### Anhang 1

Antrag vom 29.01.2019

Anschreiben Ethikkommission.pdf

Berufsrechtlicher Antrag - 29.01.2019.pdf

Datenschutzrechtliche Einwilligungserklärung.pdf

Einwilligungserklärung.pdf

Probandeninformation.pdf

Studienprotokoll.pdf

curriculumVitae\_2018-08-26\_Dissertation\_Jan-Christoph.pdf

Lebenslauf Philipp Buechner.pdf

2019-01-28\_Zustimmung-Antrag-Ethikkommission-cBioPortal-Stakeholderanalyse\_Prof-Prokosch\_  
UNTERSCHRIEBEN-SCAN.pdf

Fragebogen\_Themenpriorisierung.pdf

Fragebogen\_Themenpriorisierung\_Einladung.pdf

Interview\_1\_cBioPortal\_Alternativen.pdf

Interview\_1\_cBioPortal\_Vorstellung.pdf

Interview\_1\_Einladung.pdf

Interview\_2\_Einladung.pdf

Interview\_2\_Fragebogen.pdf

#### Anhang 2 - an der Beratung beteiligte EK-Mitglieder

Prof. Dr. Kerstin Amann, Frauenbeauftragte der Medizinischen Fakultät, Fachgebiet Pathologie, Leiterin der Nephropathologischen Abteilung

VR-OLG Dietmar Klieber, Vorsitzender Richter am OLG Nürnberg a.D.

Prof. Dr. Dieter Harms, Fachgebiet Kinderheilkunde, ehem. Leitender Oberarzt an der Kinder- und Jugendklinik

Prof. Dr. Renke Maas, Vorsitzender der Ethik-Kommission, Fachgebiet Klinische Pharmakologie und Klinische Toxikologie, Institut für Experimentelle und Klinische Pharmakologie und Toxikologie

Prof. Dr. Hajo Hamer, Fachgebiet Neurologie, Leiter des Epilepsiezentrums Erlangen

Prof. Dr. med. Robert Grützmann, Fachgebiet Allgemein- und Viszeralchirurgie, Direktor der Chirurgischen Klinik
