# Supplementary material for: Requirements Analysis and Specification for a Molecular Tumor Board Platform Based on cBioPortal
Source: Diagnostics (Basel). 2020 Feb 10;10(2):93. doi: 10.3390/diagnostics10020093 (PMC7167859; doi:10.3390/diagnostics10020093)
Supplement: Supplementary file 1 [file diagnostics-10-00093-s001.zip]

Archive with 9 entries (9 files):
- Supplementary File 1_Methods and results of scoping review.pdf
- Supplementary File 2_Guideline with questions for first round of interviews.pdf
- Supplementary File 3_Introduction of cBioPortal.pdf
- Supplementary File 4_Presentation of potential tools.pdf
- Supplementary File 5_Guideline with requirements and their options for second round of interviews.pdf
- Supplementary File 6_Ethical approval.pdf
- Supplementary File 7_Requirements surveyed during first round of interviews.pdf
- Supplementary File 8_Low-fidelity screenshot mockups.zip
- Supplementary File 9_Details about all consolidated requirements.pdf
